1 **Host 5-HT affects *Plasmodium* transmission in mosquitoes via**  
2 **modulating mosquito mitochondrial homeostasis**

3

4 Li Gao<sup>1,2,4</sup>, Benguang Zhang<sup>3,4</sup>, Yuebiao Feng<sup>1,2</sup>, Wenxu Yang<sup>1,2</sup>, Shibo  
5 Zhang<sup>1,2</sup>, Jingwen Wang<sup>1,2,5\*</sup>

6 <sup>1</sup>State Key Laboratory of Genetic Engineering, School of Life Sciences, Fudan  
7 University, Shanghai, 200438, P.R.China

8 <sup>2</sup>Ministry of Education Key Laboratory of Contemporary Anthropology, School  
9 of Life Sciences, Fudan University, Shanghai, 200438, P.R.China

10 <sup>3</sup>Shandong Institute of Parasitic Diseases, Shandong First Medical University  
11 & Shandong Academy of Medical Sciences, Jining, Shandong, 272033,  
12 P.R.China

13 <sup>4</sup>These authors contributed equally: Li Gao, Benguang Zhang.

14 <sup>5</sup>Lead Contact

15 \*Correspondence: [jingwenwang@fudan.edu.cn](mailto:jingwenwang@fudan.edu.cn) (J.W.)

16

17

18

19

20

21

22

23

24

25

26

27

28 **SUMMARY**

29 Malaria parasites hijack the metabolism of their mammalian host during the  
30 blood-stage cycle. *Anopheles* mosquitoes depend on mammalian blood to  
31 survive and to transmit malaria parasites. However, it remains understudied  
32 whether changes in host metabolism affect parasite transmission in mosquitoes.  
33 In this study, we discovered that *Plasmodium* infection significantly decreased  
34 the levels of the tryptophan metabolite, 5-hydroxytryptamine (5-HT), in both  
35 humans and mice. The reduction led to the decrease of 5-HT in mosquitoes.  
36 Oral supplementation of 5-HT to *Anopheles stephensi* enhanced its resistance  
37 to *Plasmodium berghei* infection by promoting the generation of mitochondrial  
38 reactive oxygen species. This effect was due to the accumulation of  
39 dysfunctional mitochondria caused by 5-HT-mediated inhibition of mitophagy.  
40 Elevating 5-HT levels in mouse serum significantly suppressed parasite  
41 infection in mosquitoes. In summary, our data highlight the critical role of  
42 metabolites in animal blood in determining the capacity of mosquitoes to control  
43 parasite infection.

44

45 **Keywords**

46 5-HT, ROS, mitochondrial homeostasis, *Anopheles stephensi*, *Plasmodium*

47

48

49

50

51

52

53

54

55

56

57

## 58 INTRODUCTION

59 Malaria, caused by infection with *Plasmodium* parasites transmitted through  
60 *Anopheles* mosquito bites, continues to be the world's most severe parasitic  
61 disease, resulting in an estimated 247 million clinical cases and 619,000 deaths  
62 in 2021.<sup>1</sup> *Plasmodium* spp. are obligate parasites that have lost multiple  
63 pathways for de novo nutrient synthesis and rely on the host for provision.  
64 Among these nutrients, amino acids are ones that parasites are auxotrophic for  
65 and largely obtain through salvage from the host.<sup>2</sup> Metabolic analyses of  
66 plasma from malaria patients of different ages and disease severities reveal  
67 dysregulation in multiple amino acid metabolisms.<sup>3</sup> For example, low L-citrulline  
68 and L-arginine levels have been characterized in the plasma of patients with  
69 endothelial dysfunctions.<sup>4-6</sup> Elevated alanine levels are associated with lactic  
70 acidosis in severe malaria.<sup>7</sup> Hyperphenylalaninemia is a well-characterized  
71 condition in both children and adults with severe and uncomplicated malaria.<sup>3</sup>  
72 Tryptophan metabolism is dysregulated during *Plasmodium* infection, leading  
73 to increased levels of metabolites such as kynurenine, kynurenic acid and  
74 picolinic acid, which are positively correlated with parasitemia.<sup>3</sup> Therapeutic  
75 approaches aimed at correcting the amino acid dysregulation have been shown  
76 to potentially alleviate infection pathology. For example, inhibiting the  
77 kynurenine pathway in infected mice prevents from the development of cerebral  
78 dysfunction and extends their survival.<sup>8</sup> In malaria patients, arginine infusion  
79 improves endothelial function,<sup>5</sup> while dietary arginine supplementation  
80 increases fetal weight and viability in an experimental mouse model of malaria  
81 in pregnancy by balancing angiogenic response and increasing placental  
82 vascularization.<sup>9</sup>

83  
84 *Plasmodium* infection also alters the amino acid contents in mosquitoes.  
85 Mosquitoes infected with *P. berghei* exhibit increased levels of lysine,  
86 phenylalanine, proline, threonine, and tyrosine, and decreased levels of alanine,  
87 aspartic acid, glycine, and serine.<sup>10</sup> Amino acid metabolism plays a crucial role  
88 in determining the susceptibility of mosquitoes to *Plasmodium* infections. The  
89 target of rapamycin (TOR) pathway that controls anabolic processes in  
90 mosquitoes by sensing the amino acid levels in the hemolymph antagonizes  
91 mosquito immune activity. Inhibition of the TOR pathway upregulates the  
92 expression of multiple immune effectors that promote parasite elimination.<sup>11</sup>  
93 Prolongation of amino acids catabolism in *Anopheles* mosquitoes via silencing  
94 miR-276, which targets the branched-chain amino acid transferase,  
95 compromises the sporogony of *Plasmodium falciparum*.<sup>12</sup> Additionally, the  
96 tryptophan metabolite 3-hydroxykynureine (3-HK) impairs the physical barrier,  
97 peritrophic matrix, in the midgut and facilitates *P. berghei* infection in *A.*  
98 *stephensi*.<sup>13</sup> Another tryptophan metabolite, xanthurenic acid, acts as an  
99 exflagellation elicitor, promoting *Plasmodium* development.<sup>14</sup> Therefore,  
100 *Plasmodium* infection changes the amino acid metabolism in both mammals

101 and mosquitoes, which can impact the pathogenicity and infectivity of the  
102 parasite. However, it is currently unknown whether amino acid derangements  
103 in the host affect *Plasmodium* infection in *Anopheles* vectors during  
104 transmission from mammal to mosquito through a blood meal.

105

106 In this study, we show that 5-hydroxytryptamine (5-HT) levels are reduced in  
107 mammalian hosts (human and mice) infected with *Plasmodium* parasites.  
108 Dietary supplementation of 5-HT inhibits *P. berghei* infection in mosquitoes by  
109 promoting the generation of reactive oxygen species (ROS). The elevated ROS  
110 is a result of the accumulation of dysfunctional mitochondria due to the inhibition  
111 of mitophagy by 5-HT. We also discover that elevating 5-HT levels in mouse  
112 serum suppresses the transmission of *P. berghei* from mice to *A. stephensi*,  
113 suggesting the possibility of controlling malaria transmission by manipulating  
114 host metabolism.

115

## 116 RESULTS

### 117 The reduced 5-HT in mammalian sera facilitates *P. berghei* infection in 118 mosquitoes

119 During *Plasmodium* infection in humans, the kynurenine pathway that converts  
120 tryptophan into kynurenine is perturbed.<sup>3,15</sup> To get an overview of the influence  
121 of malaria parasite on tryptophan metabolism in hosts, we performed a targeted  
122 metabolomics analysis using liquid chromatography–mass spectrometry (LC–  
123 MS) (Figure 1A). Total ten malaria patients including four infected with *P.*  
124 *falciparum*, two with *Plasmodium vivax*, three with *Plasmodium ovale*, and one  
125 with *Plasmodium malariae*, and twelve uninfected healthy adults were included  
126 in the analysis (Table S1). Among the 15 tryptophan metabolites detected in  
127 human serum (Figure 1B), four metabolites, including L-kynurenine, quinolinic  
128 acid, cinnabarinic acid and 3-hydroxy-L-kynurenine were accumulated  
129 significantly, while five metabolites, including tryptophan, 5-HT, 3-indoxyl sulfate,  
130 indole-3-propionic acid and indole acetic acid were reduced significantly in  
131 malaria patient comparing to healthy controls (Figure 1C). To investigate how  
132 *Plasmodium* infection influences tryptophan metabolism in mice, we compared  
133 tryptophan metabolism between mice 4 days post *P. berghei* infection and age-  
134 matched non-infected controls. Out of the 10 metabolites detected, four showed  
135 significant alterations. Among these metabolites, the serum levels of L-  
136 kynurenine and cinnabarinic acid were significantly elevated, while the levels of  
137 5-HT and 5-hydroxytryptophan were decreased in *P. berghei* infected mice  
138 (Figures 1D and 1E). Since 5-HT was decreased significantly in both human  
139 and mice infected with different species of *Plasmodium*, we speculated that  
140 *Plasmodium* infection might similarly reduce 5-HT levels in mosquitoes. As  
141 expected, the 5-HT level was significantly reduced in the midguts of mosquitoes  
142 that were supplied with a blood meal containing *P. berghei*, compared to the  
143 ones ingested un-infectious blood (Figure 1F). However, when the blood bolus

144 was removed from mosquito midgut, the 5-HT levels remained comparable  
145 between the two groups (Figure S1A). We next examined the 5-HT levels in  
146 mosquitoes 3-day post blood meal when the blood was digested completely  
147 and found a significant reduction of 5-HT in mosquitoes infected with parasites  
148 (Figure S1B). These results indicate that the mosquito 5-HT levels were  
149 determined by dietary 5-HT. Altogether, these results suggest that *Plasmodium*  
150 infection significantly reduces 5-HT levels in mammalian hosts (human and  
151 mice), and this disturbance could be transmitted to mosquito vectors (*A.*  
152 *stephensi*) through a blood meal.

153

154 To investigate whether 5-HT plays a role in influencing *P. berghei* infection in  
155 mosquitoes, we orally administrated mosquitoes with  $\alpha$ -methyl-DL-tryptophan  
156 (AMTP), an antagonist of tryptophan hydroxylase (TPH), which is the rate-  
157 limiting enzyme of 5-HT biosynthesis, for four days prior to *P. berghei* infection  
158 (Figure 1G). By blocking TPH, we inhibited the biosynthesis of 5-HT (Figure  
159 1H), and observed a significant increase in oocyst number in mosquitoes  
160 (Figure 1I). We next raised mosquito 5-HT levels by orally supplementing  
161 increased amounts of 5-HT with sugar meal for four days prior to blood feeding  
162 (Figures 1G and S1F). We determined the amount of 5-HT to use based on its  
163 levels in mosquitoes, as well as in the blood of humans (Figures 1F and S1C).  
164 All three doses led to a significant decrease in oocyst numbers (Figure 1J).  
165 Since 1  $\mu$ M is a similar concentration to that found in healthy human blood  
166 (Figure S1C),<sup>16</sup> and oral supplementation of 1  $\mu$ M 5-HT to mosquitoes didn't  
167 affect the amount of blood mosquito intake (Figures S1D and S1E), we used  
168 this concentration for the following treatment. After being ingested by  
169 mosquitoes, *Plasmodium* forms gametes within about 15 minutes. The  
170 gametes then undergo fertilization and differentiate into retorts, ookinetes, and  
171 oocysts<sup>17</sup>. We then examined which developmental stage was impaired by 5-  
172 HT by quantifying male gametogenesis via qPCR 15 min post-infection,<sup>18</sup> and  
173 counting retort and ookinete numbers microscopically 12 h and 24 h post-  
174 infection respectively. The administration of 5-HT significantly reduced the  
175 numbers of gametes, retorts and ookinetes compared with controls (Figures  
176 1K-1M), suggesting that 5-HT exerts a killing effect on *P. berghei* right after  
177 parasites' arrival in midgut. Altogether, these results indicate that a decrease in  
178 5-HT levels in the host's serum might promote the transmission of *Plasmodium*  
179 in mosquitoes.

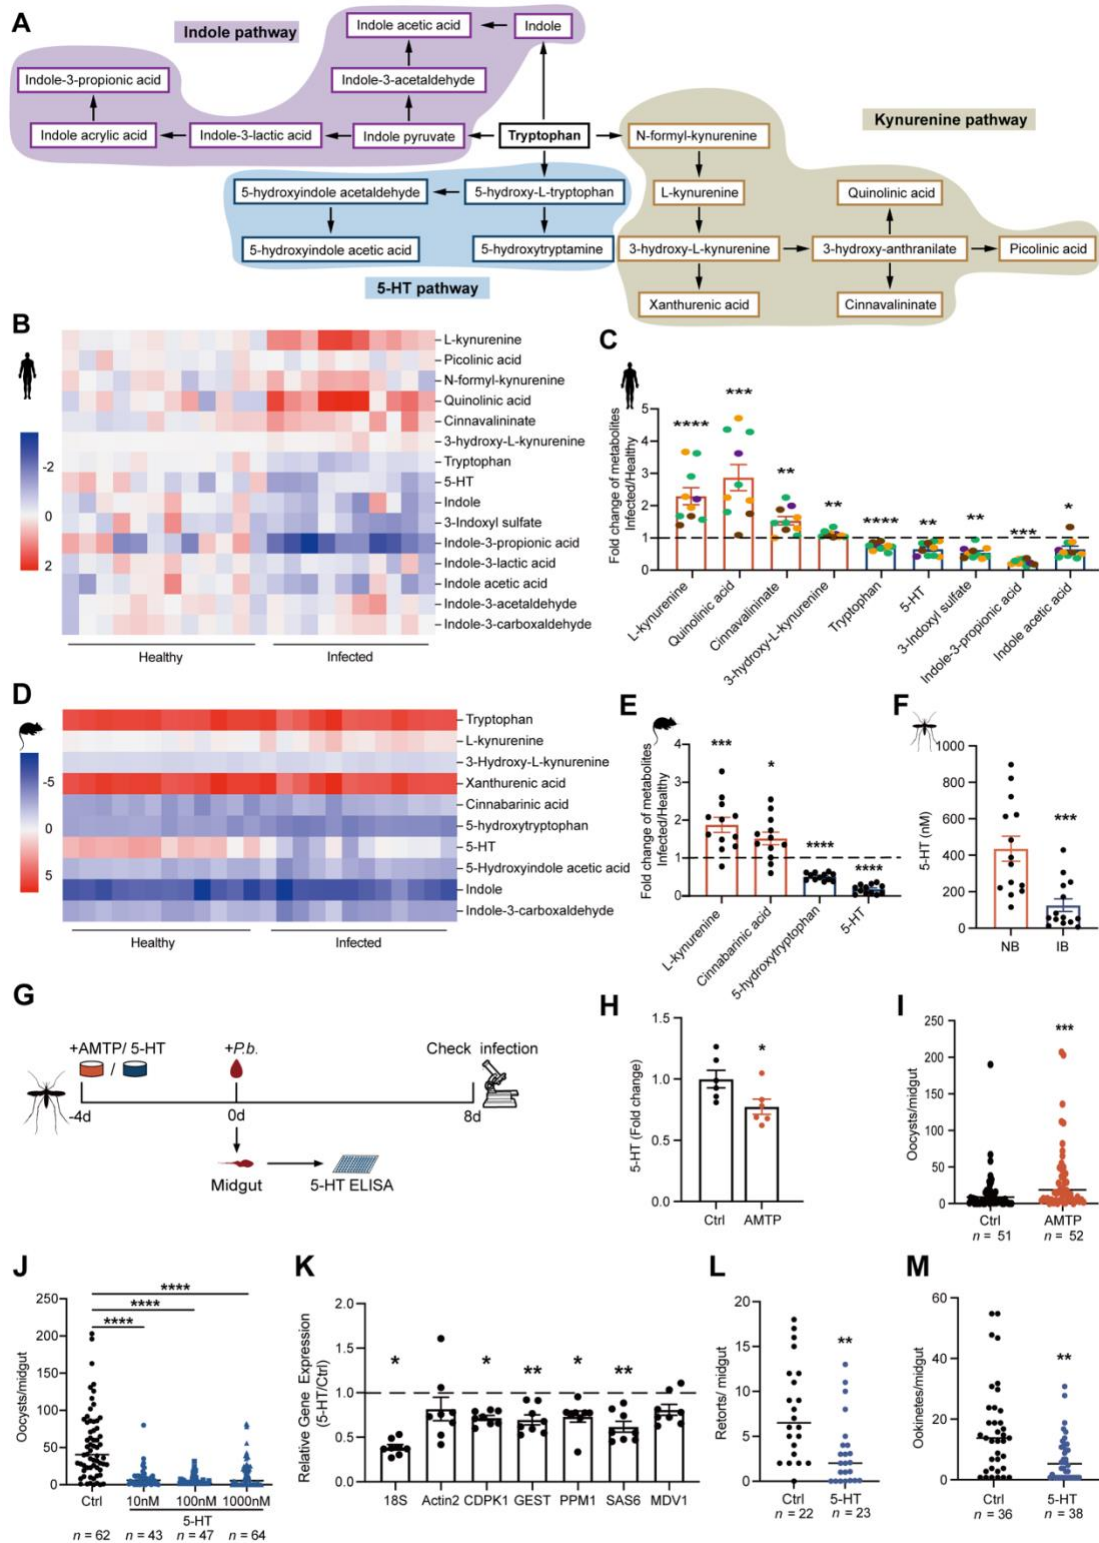

**Figure 1. 5-HT inhibits *P. berghei* infection in mosquitoes**

(A) Overview of tryptophan metabolic pathway in mammalian hosts. The purple boxes represent the metabolites of the indole pathway, the blue boxes represent the metabolites of the 5-HT pathway, and the tan boxes represent the metabolites of the kynurenine pathway.

(B) Heatmap of 15 tryptophan and metabolites detected in the sera of healthy (Healthy)



187 and parasite infected adults (Infected). Increased metabolites were shown in red;  
188 decreased metabolites were shown in blue.

189 (C) Fold changes of differentially altered metabolites in the sera of malaria patients  
190 (Infected,  $n = 10$ ) versus healthy adults (Healthy,  $n = 12$ ) analyzed by LC–MS. Metabolite  
191 abundance in malaria patients was normalized to that in healthy adults. Each dot  
192 represented an individual adult infected with *P. ovale* (orange), *P. falciparum* (green), *P.*  
193 *vivax* (brown) or *P. malariae* (purple). Data were shown as mean  $\pm$  SEM.

194 (D) Heatmap of 10 tryptophan-metabolites detected in the sera of non-infected (Healthy)  
195 and *P. berghei* infected (Infected) mice. Increased metabolites were shown in red;  
196 decreased metabolites were shown in blue.

197 (E) Fold changes of differentially altered metabolites in the sera of *P. berghei* infected  
198 (Infected,  $n = 12$ ) versus non-infected (Healthy,  $n = 12$ ) mice analyzed by LC–MS.  
199 Metabolite abundance in *P. berghei* infected mice was normalized to that of non-infected  
200 ones. Each dot represented an individual mouse. Data were shown as mean  $\pm$  SEM.

201 (F) The concentrations of 5-HT in the mosquito midguts 24 h post normal blood (NB,  $n =$   
202 14) and *P. berghei* infected blood (IB,  $n = 14$ ) analyzed by ELISA. Thirty midguts were  
203 pooled for one biological sample. Each dot represented one biological replicate. Data were  
204 pooled from three independent experiments and shown as mean  $\pm$  SEM.

205 (G) Schematic overview of AMTP and 5-HT supplementation in mosquitoes.

206 (H) Fold change of 5-HT in mosquitoes treated with (AMTP,  $n = 6$ ) and without (Ctrl,  $n = 6$ )  
207 100  $\mu$ M AMTP for 4 days (prior to blood feeding) analyzed by ELISA. The abundance of 5-  
208 HT in AMTP treated mosquitoes was normalized to that in controls. Twenty-five mosquitoes  
209 were pooled for one biological sample. Each dot represented one biological replicate. Data  
210 were pooled from two independent experiments and shown as mean  $\pm$  SEM.

211 (I) Oocyst numbers in control (Ctrl,  $n = 51$ ) and AMTP (AMTP,  $n = 52$ ) treated mosquitoes.  
212 Each dot represented an individual mosquito. Data were pooled from two independent  
213 experiments and horizontal lines represented the medians.

214 (J) Oocyst numbers in control (Ctrl,  $n = 62$ ) and mosquitoes orally supplemented with 10  
215 nM ( $n = 43$ ), 100 nM ( $n = 47$ ) and 1000 nM ( $n = 64$ ) 5-HT. Each dot represented an  
216 individual mosquito. Data were pooled from two independent experiments and horizontal  
217 lines represented the medians.

218 (K) Fold changes of male gametogenesis associated genes in the midguts of control ( $n =$   
219 8) and 1  $\mu$ M 5-HT treated ( $n = 8$ ) mosquitoes 15 min post infection. The expression levels  
220 of the target genes were normalized to S7. The relative expression levels of target genes  
221 in mosquitoes treated with 5-HT were normalized to those in the control group. Results  
222 from one of two independent experiments were shown. The second replication was shown  
223 in Fig S1G. Each dot represented five mosquito midguts. Data were shown as mean  $\pm$   
224 SEM.

225 (L) Retort numbers in the midguts of control ( $n = 36$ ) and 1  $\mu$ M 5-HT ( $n = 38$ ) treated  
226 mosquitoes 12 h post infection. Each dot represented an individual mosquito. Data were  
227 pooled from two independent experiments and horizontal lines represented the medians.

228 (M) Ookinete numbers in the midguts of control ( $n = 36$ ) and 1  $\mu$ M 5-HT ( $n = 38$ ) treated  
229 mosquitoes 24 h post infection. Each dot represented an individual mosquito. Data were  
230 pooled from two independent experiments and horizontal lines represented the medians.

231 Significance was determined by two-sided Student's t test in (C), (E), (F), (H) and (K),  
232 Mann-Whitney test in (I), (L) and (M) and ANOVA with Dunn's test in (J). \* $p < 0.05$ , \*\* $p <$   
233  $0.01$ , \*\*\* $p < 0.001$ , \*\*\*\* $p < 0.0001$ .

234

### 235 **Mitochondrial ROS inhibits *Plasmodium* infection**

236 Peripheral 5-HT plays an important role in regulating the immune system in the  
237 mammalian gut.<sup>19,20</sup> To examine whether 5-HT affects mosquito immune  
238 responses, we measured the expression levels of major immune genes and  
239 genes related to reduction-oxidation (redox) reactions in midguts 24 h post  
240 infection. The mRNA levels of most immune genes were not significantly altered  
241 by 5-HT administration. However, the expression of three genes encoding  
242 antioxidant enzymes, including copper-zinc superoxide dismutase 3 (CuSOD<sub>3</sub>),  
243 catalase 1 (CAT), and uridine 5'-diphospho-glycoprotein glucosyltransferase  
244 (UGT) were significantly upregulated, indicating the change in the redox state  
245 of the midgut (Figure 2A). We next examined the reactive oxygen species (ROS)  
246 levels of midguts microscopically by staining with dihydroethidium (DHE), a  
247 superoxide indicator. As expected, 5-HT supplementation significantly  
248 increased superoxide levels in mosquitoes 24 h and 15 min post infection  
249 (Figures 2B and S2A). ROS is a potent anti-*Plasmodium* agent in *Anopheles*  
250 mosquitoes.<sup>21</sup> To assess whether 5-HT-induced ROS inhibits parasite infection,  
251 we scavenged ROS by simultaneously supplementing 5-HT and vitamin C to  
252 mosquitoes. Vitamin C effectively reduced midgut ROS (Figure 2B) and  
253 restored oocyst numbers to control level (Figure 2C). Similarly, H<sub>2</sub>O<sub>2</sub> level was  
254 increased significantly in 5-HT-treated mosquitoes and restored to control level  
255 when vitamin C was added (Figure S2B). Administration of H<sub>2</sub>O<sub>2</sub> had the same  
256 inhibitory effect in *P. berghei* infection as 5-HT did (Figures S2C-S2G).

257

258 ROS is generated by NADPH oxidases including nicotinamide adenine  
259 dinucleotide phosphate oxidase (NOX) and Dual oxidases (DUOX), as well as  
260 a byproduct of mitochondrial oxidative phosphorylation.<sup>22,23</sup> As expression  
261 levels of NOX and DUOX showed no significant difference between 5-HT  
262 treated and control mosquitoes (Figure 2A), we hypothesized that mitochondria  
263 might be responsible for the increased ROS generation. We next measured  
264 mitochondrial-derived ROS in midguts using MitoSOX red staining and found  
265 increased fluorescent signals in 5-HT supplemented mosquitoes 24 h and 15  
266 min post infection (Figure 2D and S2H). To investigate whether 5-HT  
267 specifically promotes mitochondrial ROS generation, we inhibited  
268 mitochondrial- and NOX- derived ROS by MitoTEMPO and DPI  
269 (dibenziodolium chloride), respectively.<sup>24</sup> As expected, ROS was scavenged in  
270 mosquitoes treated with MitoTEMPO but not with DPI (Figure 2E). Accordingly,  
271 the addition of MitoTEMPO, but not DPI restored oocyst numbers to control  
272 levels (Figures 2F and S2I). Therefore, these results suggest that oral  
273 administration of 5-HT promotes the production of mitochondrial ROS, leading  
274 to the elimination of *P. berghei* in mosquitoes.



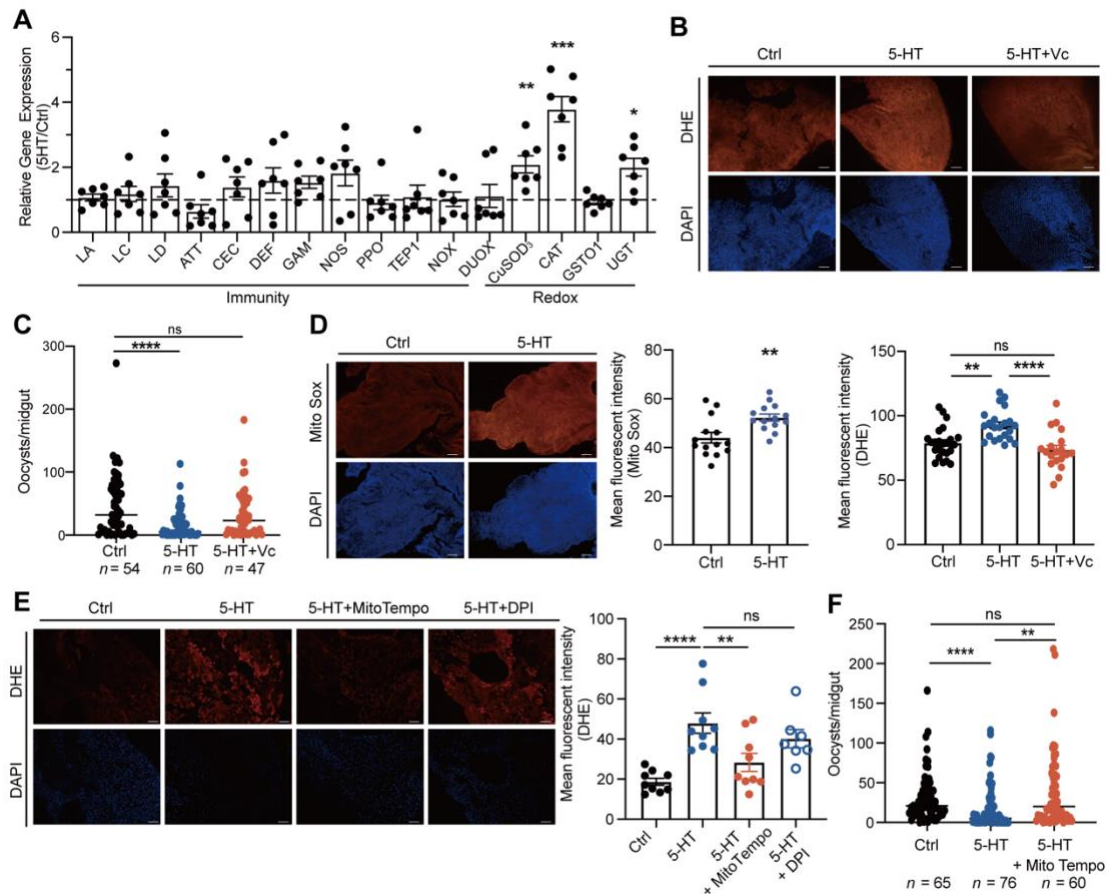

**Figure 2. 5-HT- induced mitochondrial ROS inhibits *P. berghei* infection**

275  
276  
277  
278  
279  
280  
281  
282  
283  
284  
285  
286  
287  
288  
289  
290  
291  
292  
293  
294  
295  
296  
297

(A) Fold changes of immune- and redox-related genes in the midguts of control ( $n = 7$ ) and  $1 \mu\text{M}$  5-HT treated ( $n = 7$ ) mosquitoes 24 h post infection. The expression level of the target gene was normalized to S7. The relative expression levels of target genes in 5-HT treated mosquitoes were normalized to those in controls. Each dot represented an individual mosquito midgut. Results from one of two independent experiments were shown and data were shown as mean  $\pm$  SEM. The second replication was shown in Figure S2.

(B) DHE staining (red) in the midguts of control, 5-HT ( $1 \mu\text{M}$ ) and 5-HT+vitamin C ( $3.3 \text{ mM}$ ) treated mosquitoes 24 h post infection. Nuclei were stained with DAPI (blue). Representative images were shown (up). Mean fluorescent intensity was measured and calculated as described (low). Each dot represented an individual mosquito midgut. Data were pooled from three independent experiments and shown as mean  $\pm$  SEM. Scale bar, 25  $\mu\text{m}$ .

(C) Oocyst numbers in the midguts of mosquitoes supplemented with 5-HT ( $n = 60$ ), 5-HT and vitamin C simultaneously (5-HT+Vc,  $n = 47$ ) and controls (Ctrl,  $n = 54$ ). Each dot represented an individual mosquito. Data were pooled from two independent experiments and horizontal lines represented the medians.

(D) MitoSOX (red) staining in the midgut of control and 5-HT treated mosquitoes 24 h post infection. Nuclei were stained with DAPI (blue). Representative images were shown (left). Mean fluorescent intensity was measured and calculated (right). Each dot represented an individual mosquito midgut. Data were pooled from two independent experiments and shown as mean  $\pm$  SEM. Scale bar, 25  $\mu\text{m}$ .

298 (E) DHE (red) staining in the midgut of mosquitoes treated with 5-HT, 5-HT+ MitoTempo  
299 (50  $\mu$ M) and 5-HT+ DPI (50  $\mu$ M) and control midguts 24 h post infection. Nuclei were  
300 stained with DAPI (blue). Representative images were shown (left). Mean fluorescent  
301 intensity was measured and calculated (right). Each dot represented an individual  
302 mosquito midgut. Data were pooled from two independent experiments and shown as  
303 mean  $\pm$  SEM.

304 Scale bar, 25  $\mu$ m.

305 (F) Oocyst numbers in the midguts of control ( $n = 65$ ), 5-HT ( $n = 76$ ) and 5-HT + MitoTempo  
306 ( $n = 60$ ) treated mosquitoes. Each dot represented an individual mosquito. Data were  
307 pooled from two independent experiments and horizontal lines represented the medians.  
308 Significance was determined by two-sided Student's t test in (A) and (D) and ANOVA with  
309 Dunn's test in (C) and Tukey's test in (B), (E) and (F). \* $p < 0.05$ , \*\*\* $p < 0.001$ , \*\*\*\* $p < 0.0001$ ,  
310 ns, not significant.

311

### 312 **Accumulation of damage mitochondria increases ROS production**

313 The elevation of mitochondrial ROS is associated with the increased  
314 mitochondrial biogenesis or damage. To determine whether dietary 5-HT  
315 promotes mitochondrial biogenesis, we quantified the amount of mitochondrial  
316 DNA (MtDNA) and proteins by using the five mitochondrial-encoded genes,  
317 including cytochrome c oxidase subunit I and II (*COX1* and *COX2*) and NADH  
318 dehydrogenase 1, 2 and 4 (*ND1*, 2, and 4), and two proteins, including a  
319 mitochondrial inner membrane protein ATP synthase F1 subunit alpha (*ATP5A*)  
320 and an outer membrane protein TOMM20 as indicators, respectively. We did  
321 not observe significant differences in the levels of MtDNA or proteins between  
322 5-HT-treated midguts and non-treated controls (Figures 3A-3C), suggesting  
323 that 5-HT- induced ROS production is not a result of increased mitochondrial  
324 biogenesis.

325

326 We next investigated whether the 5-HT supplementation affects mitochondrial  
327 function by analyzing the enzymatic activity of citrate synthase, a key enzyme  
328 in the Krebs cycle. We observed a 45.8% reduction in citrate synthase activity  
329 in the midguts of mosquitoes treated with 5-HT (Figure 3D). Mitochondrial  
330 membrane potential ( $\Delta\Psi_m$ ) is another indicator of mitochondrial activity. We  
331 found that mitochondrial membrane potential in mosquitoes treated with 5-HT  
332 was moderately but significantly reduced, as measured by the probe, methyl  
333 ester (TMRM) (Figure 3E). Similar results were observed in 5-HT treated-  
334 MSQ43 cells derived from *A. stephensi* (Figure S3A). We also monitored  
335 mitochondrial respiration by measuring their oxygen consumption rate (OCR).<sup>25</sup>  
336 However, due to the difficulties in collecting enough mitochondria from  
337 mosquito midguts, we switched to MSQ43 cells for OCR analysis. As expected,  
338 the addition of 5-HT to MSQ43 cells reduced the basal respiration (by 36.8%),  
339 ATP-linked respiration (by 37.3%), maximal respiration (by 32.6%) and extra  
340 respiration (by 17.6%) (Figure S3B).

341

342 To further confirm the influence of 5-HT treatment on mitochondrial dysfunction,  
343 we examined mitochondrial morphology at two time points, 5-HT treatment for  
344 4 days (24 h prior to *P. berghei* infection) and 24 h post *P. berghei* infection,  
345 using transmission electron microscopy (Figure 3F). In both blood-unfed and -  
346 fed midguts, mitochondria accumulated in the apical site of epithelial cells close  
347 to the midgut lumen (Figures 3G and 3J). The administration of 5-HT didn't  
348 affect the number of mitochondria at either time point (Figures 3H and 3K).  
349 However, it did increase mitochondrial size by 67.3% 24 h prior to and by 82%  
350 24 h post infection, compared to controls (Figures 3I and 3L). It is noteworthy  
351 that the well-organized stacks of cristae typically found in healthy mitochondria  
352 were replaced by sparse and fragmented cristae following the administration of  
353 5-HT 24 h post infection (Figure 3J). Furthermore, some mitochondria exhibited  
354 large and vacant central matrix spaces (Figure 3J). The proportion of  
355 mitochondria with abnormal cristae rose by 27.1 % in 5-HT supplemented  
356 mosquitoes compared to controls (Figure 3M). These findings collectively  
357 suggest that 5-HT supplementation impairs mitochondrial function in mosquito  
358 midguts, leading to heightened ROS production.

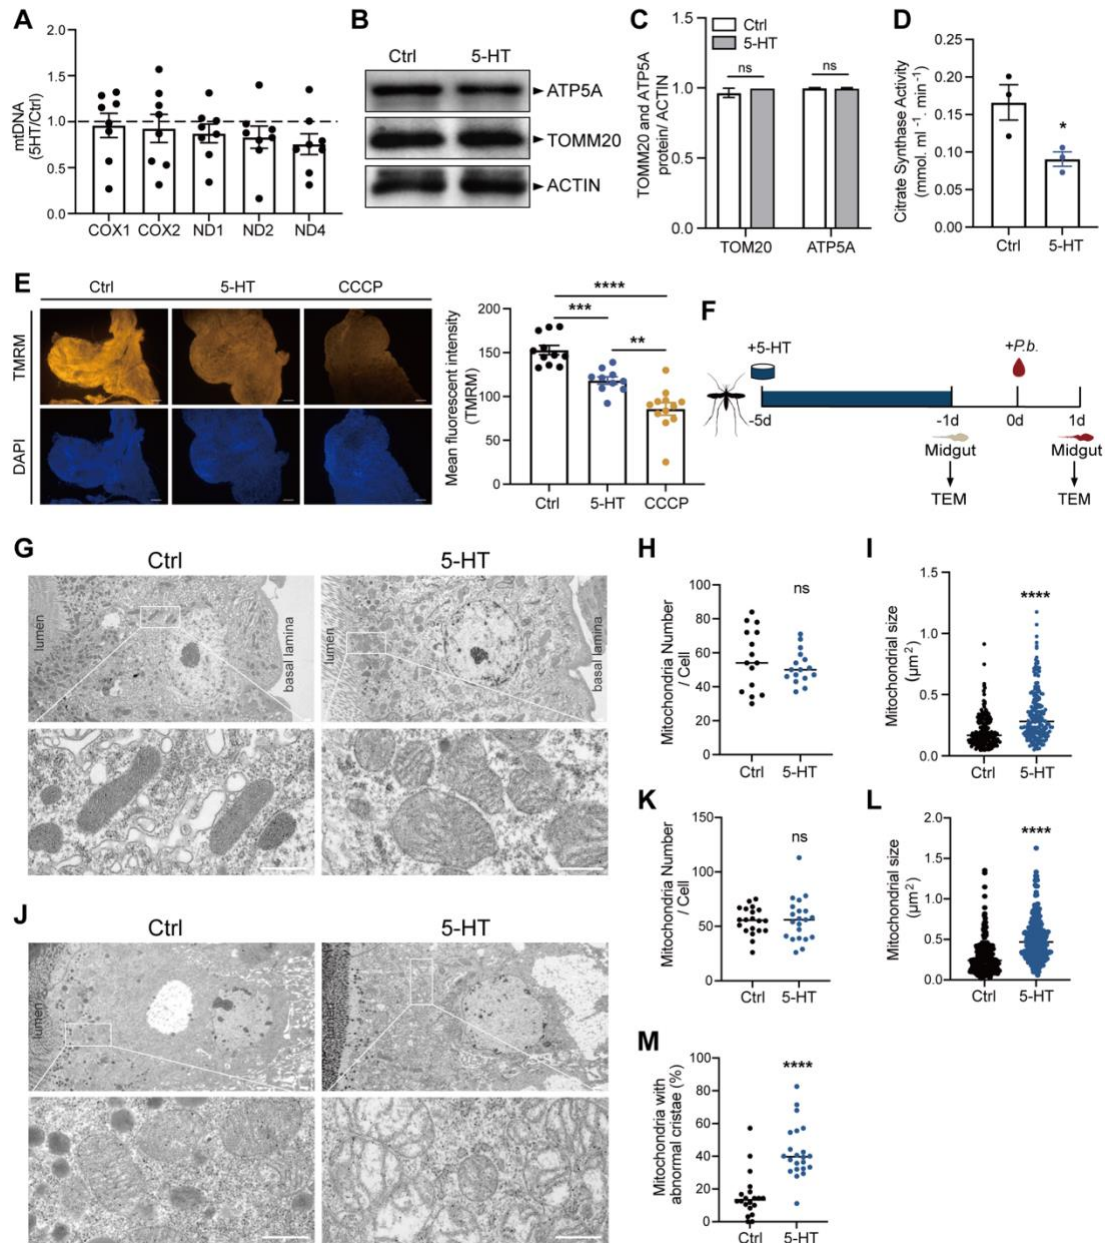

359

360 **Figure 3. 5-HT supplementation induces mitochondrial damage**

361 (A) Relative mtDNA expression levels in the midgut of control ( $n = 8$ ) and 5-HT treated ( $n = 8$ ) mosquitoes 24 h post infection. The expression level of the target gene was  
 362 = 8) mosquitoes 24 h post infection. The expression level of the target gene was  
 363 normalized to *S7*. The relative mtDNA expression levels in 5-HT treated mosquitoes were  
 364 normalized to that in controls. Each dot represented an individual mosquito midgut. Results  
 365 from one of two independent experiments were shown. The second replication was shown  
 366 in Figure S3A. Data were shown as mean  $\pm$  SEM.

367 (B) Western blot of TOMM20 and ATP5A in the midgut of control and 5-HT treated  
 368 mosquitoes 24 h post infection.

369 (C) Quantification of band intensities in (B). The expression level of the target protein was  
 370 normalized to ACTIN. Data were pooled from three independent experiments and shown  
 371 as mean  $\pm$  SEM.

372 (D) Citrate synthase activity in the midguts of control ( $n = 3$ ) and 5-HT treated ( $n = 3$ )



373 mosquitoes 4 days post treatment. A hundred mosquito midguts were pooled for one  
374 sample. Each dot represented an individual biological replicate. Data were pooled from  
375 three independent experiments and shown as mean  $\pm$  SEM.

376 (E) The mitochondrial membrane potential measured via TMRM (red) staining in the midgut  
377 of control and 5-HT treated mosquitoes 24 h post infection. The mitophagy inducer,  
378 carbonyl cyanide m-chlorophenyl hydrazone (CCCP), was used as a positive control. The  
379 nuclei were stained with DAPI (blue). Representative images were shown (left). Mean  
380 fluorescence intensity was measured and calculated (right). Each dot represented an  
381 individual mosquito midgut. Data were pooled from two independent experiments and  
382 shown as mean  $\pm$  SEM.

383 Scale bar, 25  $\mu$ m.

384 (F) Schematic overview of TEM at two time points following 5-HT supplementation in  
385 mosquitoes.

386 (G-I) Mitochondrial morphology in control and 5-HT supplemented mosquitoes 4 days post  
387 5-HT treatment. Mitochondrial structure, higher magnification images of the white boxed  
388 regions are shown in the lower panels (G), number (H) and size (I) were evaluated by  
389 transmission electron micrographs (TEM). Each dot represented an individual midgut cell  
390 in (H), individual mitochondria in (I). Horizontal lines represented the medians. Images are  
391 representatives of 15 midguts per group. Scale bar, 500 nm.

392 (J-M) Mitochondrial morphology in control and 5-HT supplemented mosquitoes 24 h post  
393 infection. Mitochondrial structure, higher magnification images of the white boxed regions  
394 are shown in the lower panels (J), number (K), size (L) and the ratio of mitochondria with  
395 abnormal cristae (M) were evaluated by transmission electron micrographs (TEM). Each  
396 dot represented an individual midgut cell in (K) and (M), individual mitochondria in (L).  
397 Horizontal lines represented the medians. Images are representatives of 20 midguts per  
398 group. Scale bar, 500 nm.

399 Significance was determined by two-sided Student's t test in (A), (C), (D) and (E) and  
400 Mann-Whitney test in (H), (I) and (K-M). \* $p < 0.05$ , \*\* $p < 0.01$ , \*\*\* $p < 0.001$ , \*\*\*\* $p < 0.0001$ ,  
401 ns, not significant.

402

### 403 **5-HT inhibits mitophagy**

404 The accumulation of functional compromised mitochondria in 5-HT treated  
405 mosquitoes might be due to the failure to eliminate unhealthy mitochondria.<sup>26</sup>  
406 Mitophagy is a mitochondrial quality control mechanism, in which dysfunctional  
407 mitochondria are engulfed by autophagosomes and fused with lysosomes for  
408 degradation.<sup>27</sup> To test whether 5-HT inhibits mitophagy, we first accessed  
409 mitophagy in MSQ43 cells treated with 5-HT by co-staining the outer  
410 mitochondrial membrane protein TOMM20 and the autophagic microtubule-  
411 associated protein 1 light chain 3B (LC3B), a member of the ATG8 family that  
412 are involved in autophagosome development and maturation.<sup>28</sup> Cells treated  
413 with CCCP, an inducer of mitophagy were used as a positive control. Treatment  
414 with 5-HT significantly reduced the colocalization of mitochondria with  
415 autophagosomes compared to control group (Figure 4A). Additionally, it  
416 decreased the formation of LC3 puncta (Figure 4B) and the association of LC3



417 puncta with mitochondria (Figure 4C), indicating that 5-HT inhibits mitophagy in  
418 vitro. We next tested the effect of 5-HT on lysosome-mitochondria association  
419 in vivo by staining freshly dissected midguts with Mitotracker and LysoTracker,  
420 and observed the similarly inhibitory effects of 5-HT on mitophagy (Figure 4D).  
421 Consistently, the protein level of LC3 was reduced upon the addition of 5-HT  
422 (Figures 4E and 4F). Altogether, these results indicate that oral administration  
423 of 5-HT inhibits mitophagy in midguts.

424

425 We next examined whether inhibition of mitophagy replicates the effects of 5-  
426 HT on parasite infection. PINK1 (Phosphatase and tensin homologue (PTEN) -  
427 induced kinase 1) is responsible for the initiation of mitophagy.<sup>27</sup> We then  
428 inhibited mitophagy via knocking down *PINK1*. As expected, knockdown of  
429 *PINK1* significantly induced ROS generation (Figures 4G and S4A) and  
430 inhibited parasite infection (Figures 4H and S4B). We next rescued 5-HT-  
431 mediated mitophagy by simultaneously administering spermidine, an activator  
432 of mitophagy, and 5-HT to mosquitoes.<sup>29,30</sup> Addition of spermidine restored the  
433 levels of LC3 protein, mitochondrial ROS, and mitophagy activity (Figures 4E,  
434 4F, 4I, and 4J). It also moderately increased susceptibility of mosquitoes to  
435 parasite infection but without statistical significance (Figure 4K). One possible  
436 explanation is that the concentration and timing of spermidine supplementation  
437 may not have been optimal for inducing sustained mitophagy in the mosquito  
438 midgut. Taken together, our results show that 5-HT-mediated inhibition of  
439 mitophagy leads to the increased dysfunctional mitochondria. This disruption of  
440 mitochondrial homeostasis in the mosquito midgut ultimately affects the  
441 infection outcomes of *Plasmodium*.

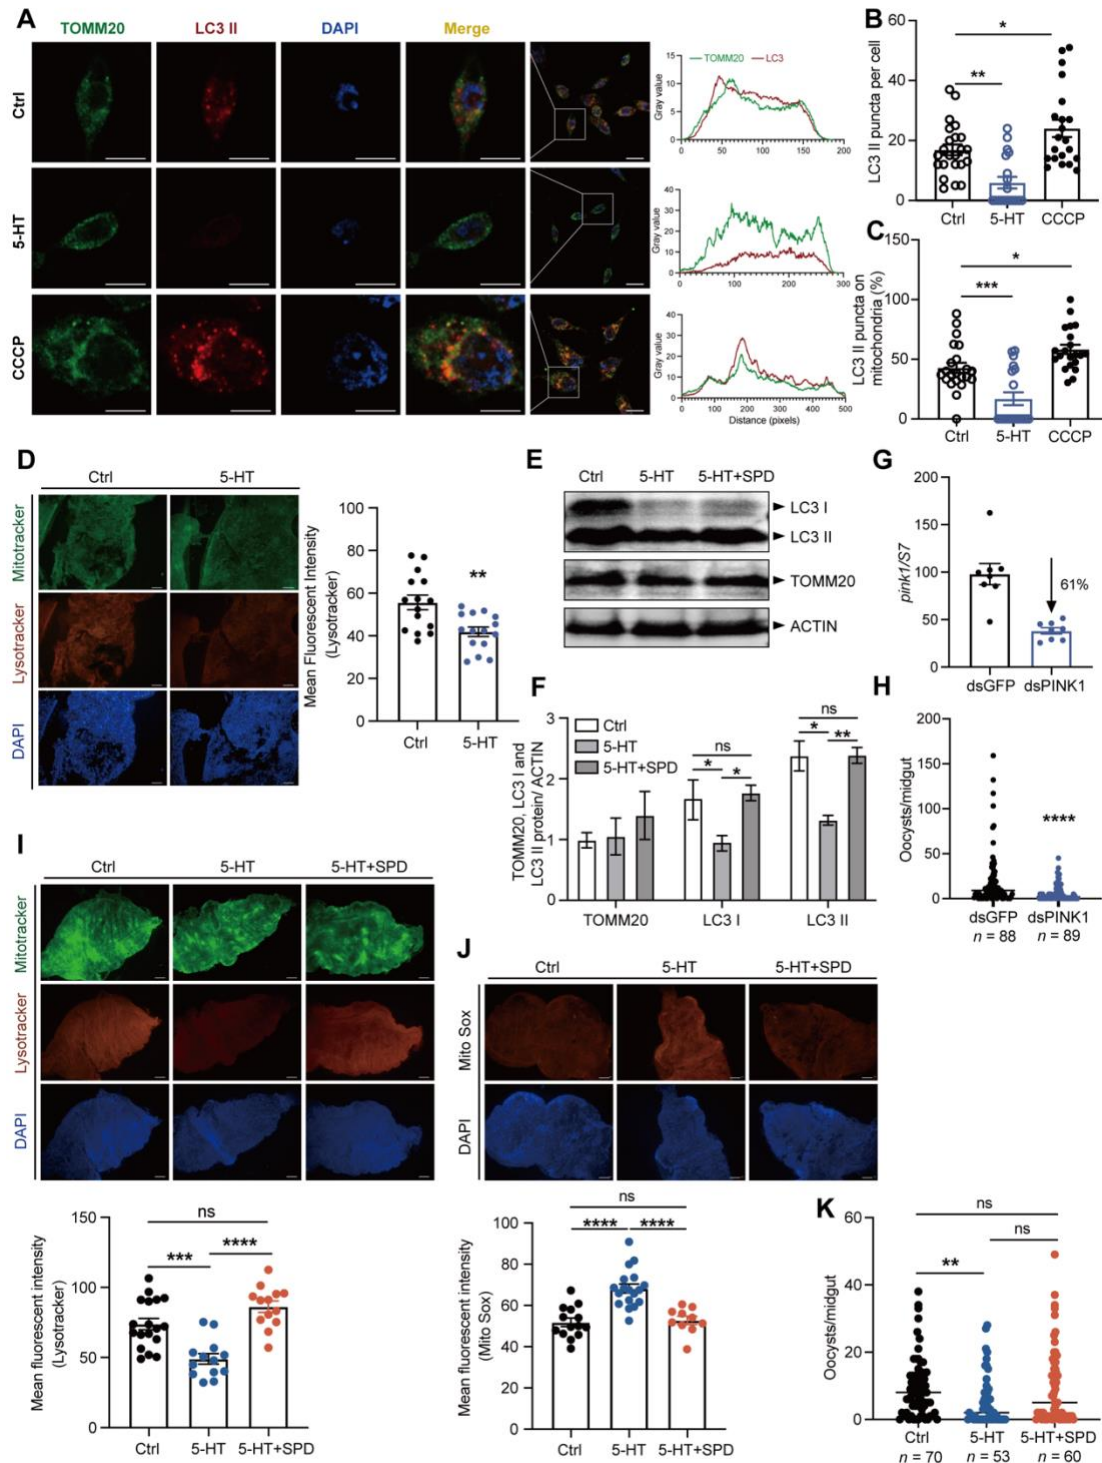

442

443 **Figure 4. 5-HT supplementation inhibits mitophagy**

444 (A) Immunostaining of mitochondria (TOMM20, green) and autophagosome (LC3 II, red)

445 in control and 5-HT treated MSQ43 cells 4 days post treatment. Nuclei were stained with

446 DAPI (blue). Cells treated with 50 nM CCCP for 20 min were used as a positive control.

447 The Pearson's coefficient indexes between LC3 II-red and TOMM20-green fluorescence

448 intensities were determined in 10 or more cells from three independent experiments. Scale

449 bar, 5  $\mu$ m.

450 (B) Calculation of LC3 puncta in control (*n* = 23), 5-HT (*n* = 19) and CCCP (*n* = 21) treated

451 MSQ43 cells in A. Each dot represented an individual cell. Data were pooled from three  
452 independent experiments and shown as mean  $\pm$  SEM.  
453 (C) The ratio of LC3 puncta colocalized with mitochondria in control ( $n = 23$ ), 5-HT ( $n = 19$ )  
454 and CCCP ( $n = 21$ ) treated MSQ43 cells in (A). Each dot represented an individual cell.  
455 Data were pooled from three independent experiments and shown as mean  $\pm$  SEM.  
456 (D) Co-staining of Mitotracker (green) and Lysotracker (red) in the midgut of control and 5-  
457 HT treated mosquitoes 24 h post infection. Nuclei were stained with DAPI (blue).  
458 Representative images were shown (left). Mean fluorescence intensity of Lysotracker was  
459 measured and calculated as described in Methods (right). Each dot represented an  
460 individual mosquito midgut. Data were pooled from three independent experiments and  
461 shown as mean  $\pm$  SEM. Scale bar, 25  $\mu$ m.  
462 (E) Western blot of LC3 I, LC3 II and TOMM20 in the control, 5-HT and 5-HT + spermidine  
463 (SPD, 100  $\mu$ M) treated mosquitoes 24 h post infection.  
464 (F) The quantification of band intensities in (E). The expression level of the target protein  
465 was normalized to ACTIN. Data were pooled from three independent experiments and  
466 shown as mean  $\pm$  SEM.  
467 (G) The *pink1* silencing efficiency in mosquitoes. Expression level of *pink1* was normalized  
468 to *A. stephensi* S7. Relative expression level of *pink1* in dsPINK1 mosquitoes was  
469 normalized to that in dsGFP controls. Each dot represented an individual mosquito. The  
470 data were shown as mean  $\pm$  SEM.  
471 (H) Oocyst numbers in the midguts of dsGFP ( $n = 88$ ) and dsPINK1 ( $n = 89$ ) mosquitoes.  
472 Each dot represented an individual mosquito. Data were pooled from three independent  
473 experiments and horizontal lines represented the medians.  
474 (I) Co-staining of Mitotracker (green) and Lysotracker (red) in the midgut of control, 5-HT  
475 and 5-HT + SPD treated mosquitoes 24 h post infection. Nuclei were stained with DAPI  
476 (blue). Representative images were shown (left). Mean fluorescence intensity of  
477 Lysotracker was measured and calculated (right). Each dot represented an individual  
478 mosquito midgut. Data were pooled from two independent experiments and shown as  
479 mean  $\pm$  SEM. Scale bar, 25  $\mu$ m.  
480 (J) Mito-Sox (red) staining in the midgut of control, 5-HT and 5-HT + SPD treated  
481 mosquitoes 24 h post infection. Nuclei were stained with DAPI (blue). Representative  
482 images were shown (left). Mean fluorescence intensity was measured and calculated  
483 (right). Each dot represented an individual mosquito midgut. Data were pooled from two  
484 independent experiments and shown as mean  $\pm$  SEM. Scale bar, 25  $\mu$ m.  
485 (K) Oocyst numbers in the midguts of control ( $n = 70$ ), 5-HT ( $n = 53$ ) and 5-HT + SPD ( $n =$   
486 60) treated mosquitoes. Each dot represented an individual mosquito. Data were pooled  
487 from two independent biological experiments and horizontal lines represented the medians.  
488 Significance was determined by ANOVA with Dunnett's test in (B), (C), Tukey's test in (H)  
489 and (I) and Dunn's test in (J), two-sided Student's t test in (D) and (F) and Mann-Whitney  
490 test in (G). \* $p < 0.05$ , \*\* $p < 0.01$ , \*\*\* $p < 0.001$ , \*\*\*\* $p < 0.0001$ , ns, not significant.

491

## 492 **Elevating 5-HT in mice serum inhibits *Plasmodium* infection in** 493 **mosquitoes**

494 Given that increasing 5-HT intake through a sugar meal inhibits *P. berghei*

495 infection in mosquitoes, we evaluated the possibility of manipulating 5-HT  
496 levels in *P. berghei*-infected mice to control parasite transmission in mosquitoes.  
497 We first orally supplemented the 5-HT reuptake inhibitor fluoxetine to mice  
498 through drinking water at the same day when they were infected with *P. berghei*,  
499 with saline solution used as negative controls (Figure 5A). After four days,  
500 serum 5-HT levels were measured, and mosquitoes were allowed to feed on  
501 these mice. Oral administration of fluoxetine increased serum 5-HT levels  
502 compared to controls (Figure 5B) and accordingly significantly inhibited *P.*  
503 *berghei* infection in mosquito midguts (Figure 5C). We next examined whether  
504 continuously feeding fluoxetine to mice would alleviate *Plasmodium*  
505 pathogenicity. Unexpectedly, administration of fluoxetine during the entire  
506 course of parasite infection didn't change parasitemia, mice weight or survival  
507 rate (Figures S5A-3C).

508

509 Fluoxetine has multiple influences on host physiology, including but not limited  
510 to modulating gut microbiota<sup>31</sup> and immunity<sup>32</sup>. These effects might neutralize  
511 its inhibitory effect on *Plasmodium*. To verify the role of 5-HT in parasite  
512 infection in mosquitoes, we next injected 5-HT through tail vein of mice 15 mins  
513 before mosquito feeding (Figure 5D). 5-HT injection restored serum 5-HT levels  
514 to normal level (Figure 5E), but had no significant influence on mosquito blood  
515 ingestion (Figure 5F). As expected, mosquitoes that ingested elevated 5-HT  
516 showed increased levels of 5-HT and ROS in midguts compared to 5-HT non-  
517 ingested controls, and their 5-HT and ROS levels were similarly to mosquitoes  
518 that fed on normal blood (Figure 5G and S5D). The oocyst number was reduced  
519 from 162 in 5-HT non-ingested controls to 17 in 5-HT ingested ones (Figure 5H).  
520 Altogether, our data show that reversing the *Plasmodium*-mediated 5-HT  
521 reduction in host serum effectively suppresses *P. berghei* infection in  
522 mosquitoes.

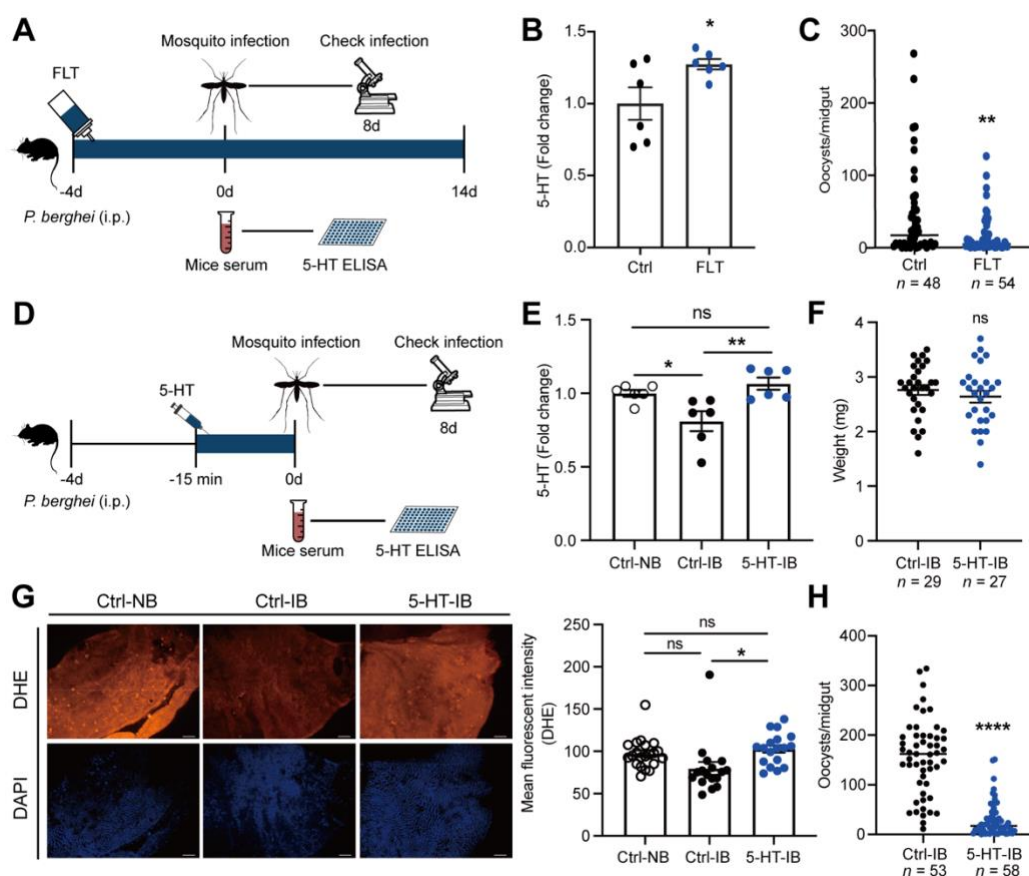

523

524

**Figure 5. The influence of 5-HT in mice serum on *Plasmodium* infection in mosquitoes**

525

526 (A) Schematic overview of fluoxetine supplementation in mice. Saline solution- treated  
527 mice were used as controls.

528 (B) Fold change of 5-HT levels in the sera of control (n = 6) and fluoxetine (FLT, n = 6)  
529 treated mice 4 days post infection analyzed by ELISA. The 5-HT level in fluoxetine treated  
530 mice was normalized to that of controls. Each dot represented an individual mouse. Data  
531 were pooled from two independent experiments and shown as mean ± SEM.

532 (C) Oocyst numbers in the midguts of mosquitoes fed on FLT treated (n = 54) or non-  
533 treated (n = 48) mice. Each dot represents an individual mosquito. Data were pooled from  
534 two independent experiments and horizontal lines represent the medians.

535 (D) Schematic overview of 5-HT injection in mice. Saline solution- treated mice were used  
536 as controls.

537 (E) Fold change of 5-HT levels in the sera of non-infected (Ctrl-NB, n = 6), *Plasmodium*  
538 infected (Ctrl-IB, n = 6) and *Plasmodium* infected mice treated with 5-HT (5-HT-IB, n = 6)  
539 4 days post infection. The 5-HT levels were measured by ELISA. The 5-HT abundance in  
540 *Plasmodium* infected and 5-HT treated mice was normalized to that of controls. Each dot  
541 represented an individual mouse. Data were pooled from two independent experiments  
542 and shown as mean ± SEM.

543 (F) The weight of fully engorged mosquitoes fed on *P. berghei*- infected mice injected with  
544 or without 5-HT. Each dot represented an individual mosquito. Data were pooled from two  
545 independent experiments and shown as mean ± SEM.



546 (G) DHE (red) staining in the midguts of mosquitoes fed on non-infected, *Plasmodium*  
547 infected and *Plasmodium* infected + 5-HT treated mice 24 h post infection. Nuclei were  
548 stained with DAPI (blue). Representative images were shown (left). Mean fluorescence  
549 intensity was measured and calculated (right). Each dot represented an individual  
550 mosquito midgut. Data were pooled from two independent experiments and shown as  
551 mean  $\pm$  SEM. Scale bar, 25  $\mu$ m.

552 (H) Oocyst numbers in the midguts of mosquitoes fed on mice injected without/with 5-HT.  
553 Each dot represents an individual mosquito. Data were pooled from two independent  
554 experiments and horizontal lines represented the medians.

555 Significance was determined by two-sided Student's t test in (B) and (F), Mann-Whitney  
556 test in (C) and (H) and ANOVA with Tukey's test in (E) and (G). \*p < 0.05, \*\*p < 0.01, \*\*\*\*p  
557 < 0.0001, ns, not significant.

558

## 559 DISCUSSION

560 5-HT is a biogenic amine that plays a role in various physiological processes.  
561 In mammals, 5-HT produced within the central nervous system regulates mood,  
562 behavior, appetite and energy expenditure. The peripheral 5-HT, mainly  
563 generated by the gut, contributes to energy metabolism in multiple organs.<sup>33</sup> In  
564 this study, we demonstrate that malaria parasite infection decreases the level  
565 of 5-HT in mammalian blood. The reduced 5-HT acquired from mice during  
566 blood feeding fails to efficiently elicit ROS generation in the mosquito midgut,  
567 thereby facilitating *Plasmodium* infection in *Anopheles* mosquitoes. Dietary  
568 interventions that increase 5-HT levels in mosquitoes through sugar and blood  
569 meals both suppress parasite infection in mosquitoes.

570

571 The role of peripheral 5-HT in *Plasmodium* pathogenesis in mammals remains  
572 unclear. Malaria parasites are known to suppress host immune responses by  
573 inducing the expression of indoleamine 2,3 dioxygenase (IDO), which is the  
574 rate-limiting enzyme of the kynurenine pathway in mammals.<sup>34-36</sup> The  
575 metabolites along the kynurenine pathway have been implicated in the  
576 pathogenesis of murine and human cerebral malaria.<sup>37</sup> The shift in tryptophan  
577 metabolism towards the kynurenine pathway may lead to the reduction of 5-HT  
578 production. The influence of 5-HT on the development of blood stage  
579 *Plasmodium* in vitro has been reported, but the results are controversial. For  
580 example, studies have shown that 5-HT promotes the formation of schizonts in  
581 the human malaria parasite *P. falciparum* by inducing Ca<sup>2+</sup> mobilization.<sup>38</sup> In  
582 contrast, when the intraerythrocytic stage of *P. falciparum* is treated with 5-HT  
583 receptor agonists, parasite growth is inhibited by blocking its surface membrane  
584 channel.<sup>39</sup> As a regulator of the immune system, 5-HT also modulates the  
585 activation and function of multiple immune cells. However, its immune activating  
586 or suppressing effect is context dependent.<sup>40</sup> Multidirectional interactions  
587 between 5-HT, mood and the peripheral immune system have been observed  
588 in viral and bacterial diseases,<sup>40</sup> suggesting a potential link between 5-HT and

589 *Plasmodium* pathogenesis.

590

591 5-HT is also an important neurotransmitter and neuromodulator in mosquitoes.  
592 It regulates hearing, heart rate, development, reproduction, metabolism, blood-  
593 feeding and flight behaviors of adult mosquitoes.<sup>41-44</sup> Here we show that 5-HT  
594 also regulates the infection outcome of *P. berghei* in *A. stephensi* by modulating  
595 mitochondrial ROS production. In mammals, 5-HT is converted to ROS through  
596 the mitochondrial enzyme monoamine oxidase-A (MAO-A).<sup>26,45</sup> It is possible  
597 that increasing the uptake of 5-HT in mosquitoes could also directly enhance  
598 ROS production. Additionally, we found that 5-HT accumulates dysfunctional  
599 mitochondria through inhibition of mitophagy, thereby aggravating ROS  
600 generation. Consistent with our findings, an increased uptake of 5-HT results in  
601 an elevated ROS production, leading to mitochondrial damage. This damage  
602 causes premature senescence and the pathogenesis of steatohepatitis in  
603 mammals.<sup>46</sup> However, the mechanism by which 5-HT inhibits mitophagy  
604 remains unclear. In human hepatocellular cancer, 5-HT activates downstream  
605 signals, p70S6K and 4E-BP1, of the mammalian target of rapamycin (mTOR)  
606 in a mTOR- independent manner, and it inhibits autophagy.<sup>47</sup> In mice  
607 cardiomyocytes, the activation of MAO-A leads to the accumulation of p53. This  
608 accumulation inhibits the translocation of parkin, a key factor that regulates  
609 mitophagy, from the cytoplasm to the mitochondria, ultimately leading to the  
610 inhibition of mitophagy.<sup>26</sup> Further studies will be needed to investigate the  
611 mechanisms of 5-HT-mediated mitophagy inhibition.

612

613 Moreover, the mechanisms underlying the role of mitochondrial ROS in the  
614 elimination of *P. berghei* remain unclear. Mitochondrial ROS can trigger NADPH  
615 oxidase-mediated cellular ROS generation in mammals and plants.<sup>48</sup> Here  
616 we show that sequestration of mitochondrial ROS inhibits the total ROS  
617 generation, while blocking the NOX- derived ROS doesn't influence  
618 mitochondrial ROS. These results indicate that mitochondrial ROS in  
619 mosquitoes may similarly play a role in promoting cellular ROS generation,  
620 which in turn influences the survival of *Plasmodium*.

621

622 Animal blood is crucial for mosquito physiology and reproduction, as it serves  
623 as their primary source of nutrition.<sup>49</sup> Moreover, blood constituents have been  
624 increasingly recognized as important regulators for vector competence. For  
625 example, human low-density lipoprotein inhibits dengue virus acquisition in  
626 mosquitoes.<sup>50</sup> Human blood-derived miRNA, hsa-miR-150-5p, disseminates to  
627 mosquito hemocoel and facilitates dengue virus infection by suppressing the  
628 expression of the antiviral *chymotrypsin* gene in mosquitoes.<sup>51</sup> Our study  
629 reveals a novel role of a blood-derived metabolite, 5-HT, in modulating the  
630 vector competence of mosquitoes for parasite infection. Elevating the 5-HT  
631 level in mouse serum restores the 5-HT level in mosquitoes and increases their  
632 ability to eliminate parasites. In line with our findings, there is a negative

633 correlation between serum iron levels in humans and dengue virus acquisition  
634 by mosquitoes. Elevating serum iron concentration in mice reduces dengue  
635 virus infection in *Aedes* mosquitoes.<sup>52</sup> Interestingly, although increased uptake  
636 of 5-HT induces ROS generation and accumulates dysfunctional mitochondria,  
637 we didn't find any defects in mosquito feeding capacity or survival. One possible  
638 explanation is that a moderate increase in ROS generation induced by 5-HT  
639 helps mosquitoes eliminate parasite infection without negatively affecting their  
640 physiology. Altogether, these findings suggest the potential for manipulating  
641 host metabolism to suppress pathogen transmission in vectors.

642

## 643 STAR★METHODS

644 Ethics statement: This study was reviewed and approved by the  
645 Institutional Review Board of Shandong Institute of Parasitic Diseases, China.  
646 Informed consent was obtained from all participant. All blood samples were  
647 collected for the standard diagnostic tests, with no additional burden to the  
648 patients. All procedures involving mosquitoes and mice were carried out  
649 according to the guidelines for animal care and use of Fudan University and  
650 were permitted by the Animal Care and Use Committee, Fudan University,  
651 China.

652 Mosquito rearing and treatments: *A. stephensi* (strain Hor) was reared in  
653 the insectary with 28°C, 80% relative humidity and 12:12 light/dark cycles.  
654 Adults were fed on 10% sucrose solution and females were fed on mice for  
655 laying eggs. The chemicals, including 5-HT,  $\alpha$ -Methyl-DL-tryptophan (AMTP,  
656 Sigma), spermidine (SPD, Sigma), H<sub>2</sub>O<sub>2</sub> (Sangon, China), Vitamin C (Vc,  
657 Sigma), MitoTempo (Sigma), Dibenziodolium chloride (DPI, Sigma), were  
658 dissolved in sterile water, and carbonyl cyanide *m*-chlorophenyl hydrazone  
659 (CCCP, Yeason, China) was dissolved in DMSO. Newly-emerged mosquitoes  
660 were fed with 10% sucrose solution containing 100  $\mu$ M AMTP,<sup>53</sup> 100  $\mu$ M  
661 spermidine<sup>54</sup>, 50 nM CCCP, and 5-HT and H<sub>2</sub>O<sub>2</sub> with dedicated concentrations  
662 for four days prior to blood feeding, respectively. For ROS inhibition,  
663 antioxidants, including 3.3 mM Vitamin C,<sup>55</sup> 50  $\mu$ M MitoTempo<sup>56</sup> and 50  $\mu$ M  
664 DPI<sup>24</sup> were administrated along with 5-HT through water during 24 h starvation  
665 prior to blood feeding. To administrate 5-HT to mosquitoes through blood meal,  
666 three to five days old adult mosquitoes were fed on mice that were orally  
667 supplemented with fluoxetine or intravenously injected with 5-HT.

668 Cell cultures: Cell line MSQ43 was grown in Schneider's medium (Gibco)  
669 supplemented with 10% heat-inactivated fetal bovine serum (FBS, Gibco), 100  
670 IU/mL penicillin and 100  $\mu$ g/mL streptomycin (Thermo Fisher) at 28 °C. For 5-  
671 HT treatment, approximately  $5 \times 10^5$  cells were seeded per well in 12-well  
672 plates and incubated with 1  $\mu$ M 5-HT for 3 days until they reached 70–90%  
673 confluency, and then used for subsequent detection. The mitophagy inducer  
674 CCCP was used as a positive control as described.<sup>57</sup>

675 *P. berghei* infection: Six to eight-week-old Balb/c mice were injected

676 intraperitoneally (i.p.) with  $10^6$  infected RBCs with *P. berghei* (ANKA).<sup>58</sup> To  
677 evaluate parasitemia, thin blood smears were taken for Giemsa staining (Baso  
678 Diagnostics Inc, Zhuhai, China) daily from day 3 post injection. When the  
679 parasitemia reached 4-6%, the infected mice were used for mosquito infection.  
680 The engorged mosquitoes were maintained at 21°C. The unengorged  
681 mosquitoes were removed 24 h post blood meal. To evaluate the infection  
682 status, mosquito midguts were dissected at the indicated time points after  
683 infection. At 15 min post-infection, the gamete levels were determined using  
684 qPCR. At 12 h post-infection, the retort numbers were counted by examining  
685 thin blood smears from midguts containing the blood bolus. At 24 h post-  
686 infection, the blood bolus was removed from the midguts. After multiple PBS  
687 washes, the ookinete number in the midgut epithelium was examined using a  
688 fluorescence microscope. At 8 days post-infection, oocyst numbers were  
689 counted microscopically.

690 Mice treatments: For fluoxetine treatment, fluoxetine (15 µg/ml) (Sigma)  
691 was dissolved in sterile water. Six to eight-week-old Balb/c mice right after  
692 intraperitoneally injected with *P. berghei* were given fluoxetine (15 µg/ml)-  
693 containing drinking water for 4 days and 14 days, respectively. Control mice  
694 with provided with the saline solution as described.<sup>59</sup> Parasitemia, 5-HT level,  
695 and weight of these mice were examined at dedicated time. For administration  
696 of 5-HT intravenously, 5-HT stock solution (1 mM) was prepared in sterile water  
697 and diluted to a final working concentration in saline solution. Mice with 4-6%  
698 parasitemia were injected with 5-HT via the tail vein at 0.5 mg/kg. Mice injected  
699 with equal amount of saline solution were used as control.<sup>60</sup> Mosquitoes were  
700 allowed to feed 15 min post 5-HT administration.

701 5-HT measurement: The 5-HT levels of mosquitoes were measured using  
702 a serotonin ELISA kit (Biovision, USA) according to the manufacturer's  
703 instructions. In brief, 30 midguts with blood bolus and 60 midguts without blood  
704 bolus, which were removed 24 h post blood meal were pooled for one biological  
705 sample. 30 midguts 3 days post blood meal were pooled for one biological  
706 sample. 25 whole mosquitos 4 days post treatment (24 h prior to blood meal)  
707 were pooled for one biological sample. Each sample was homogenized in 450  
708 µL PBS and stored at -20°C overnight. Two freeze-thaw cycles were performed  
709 to break the cell membranes, and the homogenates were centrifuged for 5 min  
710 at 5000 × g. The supernatant was used for 5-HT quantification immediately.

711 LC-MS analysis: The blood samples from both normal and *Plasmodium*-  
712 infected mice and humans were collected in 1.5 mL EP tubes and allowed to  
713 settle for at least 1 h at 37 °C. Afterward, the blood samples were kept at 4 °C  
714 overnight to ensure complete blood clotting. The serum was then separated by  
715 centrifugation at 2000 x g for 10 min. The serum samples were sent to APEX BIO  
716 Technology LLC in China for liquid chromatography- mass spectrometry (LC-  
717 MS) analysis using a Nexera UHPLC system (Shimadzu) coupled to an  
718 ABSciex QTrap 5500 or 6500 mass spectrometer (Framingham). Peak  
719 identification and amounts of metabolites were evaluated using Analyst and

720 SCIEX OS software based on the known amounts of tryptophan metabolites.

721 Hemoglobin quantification: The hemoglobin levels of mosquitoes were  
722 measured using a hemoglobin assay kit (Abcam) according to the  
723 manufacturer's instructions. In brief, 30 midguts with blood bolus 0 h post blood  
724 meal were pooled for one biological sample. Each sample was homogenized  
725 in 500  $\mu$ L distilled water and used for hemoglobin quantification immediately.

726 ROS detection: Superoxide anion levels were detected in live tissues as  
727 previously described.<sup>61</sup> In brief, midguts 15min and 24 h post blood meal were  
728 dissected in PBS and stained with 5  $\mu$ M of the intracellular ROS-sensitive dye  
729 Dihydroethidium (DHE, Beyotime, China) for 20 min at room temperature in dim  
730 light, followed by 3x washings in PBS for 15 min. Then the midguts were stained  
731 with 4',6'-diamidino-2-phenylindole (DAPI) (Solarbio, China) for 10 min and  
732 mounted using Fluoromount™ Aqueous Mounting Medium (Sigma-Aldrich,  
733 USA). Images were acquired using a fluorescence microscope (Olympus,  
734 Germany). The same exposure parameters were used to compare  
735 fluorescence levels in different samples. Mean fluorescence intensity from the  
736 whole midgut was measured and calculated by Image J.

737 For hydrogen peroxide (H<sub>2</sub>O<sub>2</sub>) measurement, midguts 24 h post infection  
738 were dissected and assessed by H<sub>2</sub>O<sub>2</sub> detection Kit (Beyotime, China)  
739 according to the protocol. Briefly, 15 midguts were pooled for one biological  
740 replicate and homogenized in lysis buffer provided by the kit. A hundred  $\mu$ L  
741 supernatant of the homogenate after centrifugation was measured at OD560  
742 nm using a multiwell plate reader (Synergy™ 2, BioTek). The midguts protein  
743 levels were determined by BCA assay (Thermo Fisher). The H<sub>2</sub>O<sub>2</sub> levels were  
744 normalized to protein amount.

745 To measure the mitochondrial ROS level, midguts 15 min and 24 h post  
746 infection were dissected in PBS and incubated with 5  $\mu$ M of the mitochondrial  
747 superoxide Indicator, MitoSox Red (Yeasen, China) for 30 min at 37 °C in dim  
748 light, followed by 3x washings in PBS for 15 min. Then the midguts were stained  
749 with DAPI for 10 min and mounted using Mounting Medium. Images were  
750 acquired using a fluorescence microscope (Olympus, Germany). The same  
751 exposure parameters were used to compare fluorescence levels in different  
752 samples. Mean fluorescence intensity from the whole midgut was measured  
753 and calculated by Image J.

754 Mitochondrial membrane potential measurement: To assess mitochondrial  
755 membrane potential, midguts were dissected 24 h post infection in PBS and  
756 incubated in 100 nM TMRM dye (Invitrogen) for 30 min at 37 °C in dim light,  
757 followed by 3x washings in PBS for 15 min. Then the midguts were stained with  
758 DAPI for 10 min and mounted using Mounting Medium. Images were acquired  
759 using a fluorescence microscope (Olympus, Germany). The same exposure  
760 parameters were used to compare fluorescence levels in different samples.  
761 Mean fluorescence intensity from the whole midgut was measured and  
762 calculated by Image J.

763 Oxygen consumption rate measurement: Mitochondrial respiration of  
764 MSQ43 cells were monitored at 25 °C using the Oxygraph-2k (Oroboros)



765 according to the operating instruction.<sup>62</sup> In brief,  $1 \times 10^5$  cells cultured in 6-well  
766 plate were collected and resuspended in 200  $\mu$ l serum-free Schneider's  
767 medium (Gibco). Cells were equilibrated for 20 minutes in 2.5 ml medium prior  
768 to measurements. For analyzing the respiration of each mitochondrial complex,  
769 the following compounds were then sequentially injected to the chamber:  
770 0.25mM oligomycin, 0.1mM FCCP, 0.5  $\mu$ M rotenone and 2.5  $\mu$ M antimycin A.<sup>63</sup>  
771 The oxygen consumption was expressed as pmol O<sub>2</sub> consumed per minutes  
772 per mg protein cells. The protein levels were determined using BCA assay  
773 (Thermo Fisher).

774 Transmission electron microscopy: Midguts of mosquitoes supplemented  
775 with 5-HT for four days were dissected at day four (24 hr prior to) and day 6 (24  
776 hr post infection) in cool PBS and prefixed with 2.5% glutaraldehyde (Sangon,  
777 China) at 4°C overnight. After 3 $\times$  washings in PBS for 15 min, midguts were  
778 post-fixed in 1 % osmium tetroxide (Sigma) for 2 h at 4°C, followed by  
779 dehydrating in an ascending series of ethanol (50%, 70%, 80%, 90%, and  
780 100%). After dehydration, the samples were embedded in Epon 812 resin  
781 (EMCN, China) and polymerized at 65°C for 48 h.<sup>64</sup> After trimming, blocks were  
782 sectioned in an Ultracut Reicher ultramicrotome. Regions of interest were  
783 selected, cut into ultrathin sections (50-nm thick) mounted on the copper grids,  
784 and then stained with uranyl acetate and lead citrate. The sections were  
785 examined and photographed in a Jeol JEM 1400 electron microscope  
786 performed by Servicebio Technology LLC, China. To quantify mitochondrial  
787 number, size and the percentage of mitochondria with abnormal cristae,  
788 scanned images of at least 3 sections of each midgut cell were analyzed using  
789 Fiji ImageJ (NIH).<sup>65</sup>

790 Citrate synthase activity assay: The activity of citrate synthase was  
791 measured as described.<sup>66</sup> In brief, 100 midguts of sugar fed mosquitoes  
792 administrated with/without serotonin were dissected in cool PBS and  
793 homogenized in 200  $\mu$ l lysis buffer (0.25% TritonX-100/PBS) at 4°C. After 1: 2  
794 dilution in lysis buffer, 40  $\mu$ l of the lysate mixed with 60  $\mu$ l reaction buffer (0.25%  
795 TritonX-100/PBS, 0.31mM acetyl CoA, 0.1mM DTNB and 0.5mM oxaloacetate).  
796 The activity of citrate synthase was measured at 412 nm on a regular kinetic  
797 program (every 30 s for 5 min) at 30°C immediately by a multiwell plate reader  
798 (Synergy™ 2, BioTek).

799 Lysotracker staining: Midguts were dissected 24 h post infection in PBS  
800 and incubated in 1  $\mu$ M Mito-Tracker Green (Beyotime) for 30 min at 37 °C in  
801 dim light, then the midguts were stained with 1  $\mu$ M Lysotracker DS Red DND-  
802 99 (Invitrogen) for 5 min at room temperature in dim light, followed by 3 $\times$   
803 washings in PBS for 15 min. Then the midguts were stained with 4',6'-  
804 diamidino-2-phenylindole (DAPI) (Solarbio, China) for 10 min and mounted  
805 using Fluoromount™ Aqueous Mounting Medium (Sigma-Aldrich, USA).  
806 Images were acquired using a fluorescence microscope (Olympus, Germany).  
807 The same exposure parameters were used to compare fluorescence levels in  
808 different samples. Mean fluorescence intensity from the whole midgut was

809 measured and calculated by Image J.

810 RNA interference: The cDNA clones of PINK1(ASTE000869) and plasmid  
811 eGFP (BD Biosciences) were served as templates for double-stranded RNA  
812 (dsRNA) preparation using gene-specific primers (Table S2). The dsRNA was  
813 synthesized by MEGAscript™ T7 Transcription Kit (Thermo Fisher). Four to six-  
814 day-old females were injected intrathoracically with 69 nl of 4 µg/µl dsPINK1  
815 using a Nanoject II microinjector (Drummond). Equal amounts of dsGFP were  
816 injected as a control. Silencing efficiency was examined two days post-dsRNA  
817 treatment by quantitative PCR as described below.

818 Quantitative PCR: For gene expression analysis in *A. stephensi*, total RNA  
819 was extracted from mosquitoes 15 min and 24 h post infection by TRIzol  
820 (Accurate Biology, China). Reverse transcription and quantitative PCR were  
821 performed as previously described.<sup>58</sup> The expression levels of target genes  
822 were normalized by the *A. stephensi* ribosomal gene *S7*. The primers used for  
823 this study are listed in Table S2, Supporting Information.

824 Western blot: Proteins of 10 mosquitoes 24 h post infection were extracted  
825 in 300 µl lysis buffer (125 mM Tris, pH 6.8; 8 M urea; 2% SDS; 5% beta  
826 mercaptoethanol). Immunoblotting was performed using standard procedures  
827 using mouse anti-TOMM20 (Santa Cruz) (1:100), rabbit anti-LC3B (1:1000)  
828 (Abmart, China), and rabbit anti-actin (1:1000) (Abbkine, China). Intensity of  
829 the signals was quantified by Image J.

830 Immunohistochemistry: MSQ43 cells were fixed in 4% paraformaldehyde  
831 for 2 h at 4 °C, followed by three 10-min washes in PBS containing 0.1% Triton-  
832 100. After blocking in 3% BSA for 2 h at 4 °C, cells were incubated with anti-  
833 TOMM20 mouse polyclonal antibody (Santa Cruz) (1:100 dilution) and anti-  
834 LC3B rabbit polyclonal antibody (Abcam) (1:50 dilution) overnight at 4 °C. The  
835 secondary antibody, anti-rabbit Alexa Fluor 546 and anti-mouse Alexa FITC 488  
836 (Invitrogen) were used at 1:1000 dilution. The nucleus was stained with 10 µg/µl  
837 DAPI. Images were acquired by a Zeiss-LSM880 confocal microscope with  
838 Airyscan. The same exposure parameters were used to compare fluorescence  
839 levels in different images. The Pearson's coefficient indexes between LC3 II  
840 and TOMM20 fluorescence intensities, the number of LC3 II puncta and the  
841 percent of LC3 II puncta with mitochondria were measured and calculated by  
842 Image J, respectively.

843 Statistical analysis: Replicates and sample sizes for all experiments were  
844 provided in the corresponding figure legends. All statistical analyses were  
845 performed using GraphPad Prism software (v.8). The comparison of two groups  
846 were analyzed using the Mann-Whitney test for non-normally distributed data,  
847 and Student's t-test for normally distributed data. A Log-rank (Mantel-Cox) test  
848 was performed to compare the survival curves of *A. stephensi* exposed to 5-HT,  
849 H<sub>2</sub>O<sub>2</sub> and control solution and mice supplemented with or without fluoxetine.  
850 The one-way ANOVA with different multiple comparisons tests were used to  
851 compare the difference among more than two groups depending on the  
852 normality of the data.

853

854 **SUPPLEMENTAL INFORMATION**

855 Supplemental information can be found online.

856

857 **ACKNOWLEDGMENTS**

858 This work was supported by National Natural Science Foundation of China

859 (U1902211), the Shanghai Pilot Program for Basic Research - Fudan University

860 (22TQ015) to J. W.

861

862 **AUTHOR CONTRIBUTIONS**

863 Conceptualization, L.G., B.G., and J.W., Methodology, L.G., B.G., Y.B., W.X.,

864 S.B. and J.W.; Investigation, L.G., B.G., Y.B., W.X., S.B. and J.W.; Formal

865 Analysis, L.G., and J.W., Writing Original Draft, L.G., and J.W.; Writing, Review

866 & Editing, L.G., J.W.; Visualization, L.G., and J.W.; Funding Acquisition, J.W.;

867 Resources, J.W., Supervision, J.W.

868

869 **DECLARATION OF INTERESTS**

870 The authors declare no competing interests.

871

872 **Data Availability Statement**

873 The data that support the findings of this study are available from the

874 corresponding author upon reasonable request.

875

876

877

878

879

880

881

882

883

884

885

886

## 887 REFERENCES

- 888 1. WHO (2022). World Malaria Report 2022. who.
- 889 2. Gardner, M.J., Hall, N., Fung, E., White, O., Berriman, M., Hyman, R.W., Carlton, J.M.,  
890 Pain, A., Nelson, K.E., Bowman, S., et al. (2002). Genome sequence of the human  
891 malaria parasite *Plasmodium falciparum*. *Nature* *419*, 498-511.
- 892 3. Abdrabou, W., Dieng, M.M., Diawara, A., Serme, S.S., Almojil, D., Sombie, S., Henry,  
893 N.B., Kargougou, D., Manikandan, V., Soulama, I., and Idaghdour, Y. (2021).  
894 Metabolome modulation of the host adaptive immunity in human malaria. *Nat Metab* *3*,  
895 1001-1016.
- 896 4. Leopold, S.J., Ghose, A., Allman, E.L., Kingston, H.W.F., Hossain, A., Dutta, A.K.,  
897 Plewes, K., Chotivanich, K., Day, N.P.J., Tarning, J., et al. (2019). Identifying the  
898 Components of Acidosis in Patients With Severe *Plasmodium falciparum* Malaria Using  
899 Metabolomics. *The Journal of infectious diseases* *219*, 1766-1776.
- 900 5. Yeo, T.W., Lampah, D.A., Gitawati, R., Tjitra, E., Kenangalem, E., McNeil, Y.R., Darcy,  
901 C.J., Granger, D.L., Weinberg, J.B., Lopansri, B.K., et al. (2007). Impaired nitric oxide  
902 bioavailability and L-arginine reversible endothelial dysfunction in adults with  
903 *falciparum* malaria. *J Exp Med* *204*, 2693-2704.
- 904 6. Yeo, T.W., Lampah, D.A., Gitawati, R., Tjitra, E., Kenangalem, E., McNeil, Y.R., Darcy,  
905 C.J., Granger, D.L., Weinberg, J.B., Lopansri, B.K., et al. (2008). Recovery of  
906 endothelial function in severe *falciparum* malaria: relationship with improvement in  
907 plasma L-arginine and blood lactate concentrations. *The Journal of infectious diseases*  
908 *198*, 602-608.
- 909 7. Yeo, T.W., Lampah, D.A., Kenangalem, E., Tjitra, E., Price, R.N., Weinberg, J.B.,  
910 Hyland, K., Granger, D.L., and Anstey, N.M. (2015). Impaired systemic  
911 tetrahydrobiopterin bioavailability and increased dihydrobiopterin in adult falciparum  
912 malaria: association with disease severity, impaired microvascular function and  
913 increased endothelial activation. *PLoS pathogens* *11*, e1004667.
- 914 8. Clark, C.J., Mackay, G.M., Smythe, G.A., Bustamante, S., Stone, T.W., and Phillips,  
915 R.S. (2005). Prolonged survival of a murine model of cerebral malaria by kynurenine  
916 pathway inhibition. *Infection and immunity* *73*, 5249-5251.
- 917 9. McDonald, C.R., Cahill, L.S., Gamble, J.L., Elphinstone, R., Gazdzinski, L.M., Zhong,  
918 K.J.Y., Philson, A.C., Madanitsa, M., Kalilani-Phiri, L., Mwapasa, V., et al. (2018).  
919 Malaria in pregnancy alters l-arginine bioavailability and placental vascular  
920 development. *Science translational medicine* *10*.
- 921 10. Gad, A.M., Maier, W.A., and Piekarski, G. (1979). Pathology of *Anopheles stephensi*  
922 after infection with *Plasmodium berghei berghei*. II. Changes in amino acid contents. *Z*  
923 *Parasitenkd* *60*, 263-276.
- 924 11. Feng, Y., Chen, L., Gao, L., Dong, L., Wen, H., Song, X., Luo, F., Cheng, G., and Wang,  
925 J. (2021). Rapamycin inhibits pathogen transmission in mosquitoes by promoting  
926 immune activation. *PLoS Pathog* *17*, e1009353.
- 927 12. Lampe, L., Jentzsch, M., Kierszniowska, S., and Levashina, E.A. (2019). Metabolic  
928 balancing by miR-276 shapes the mosquito reproductive cycle and *Plasmodium*  
929 *falciparum* development. *Nature communications* *10*, 5634.

- 930 13. Feng, Y., Peng, Y., Song, X., Wen, H., An, Y., Tang, H., and Wang, J. (2022). *Anophele*  
931 mosquitoes are protected against parasite infection by tryptophan catabolism in gut  
932 microbiota. *Nature microbiology*.
- 933 14. Billker, O., Lindo, V., Panico, M., Etienne, A.E., Paxton, T., Dell, A., Rogers, M., Sinden,  
934 R.E., and Morris, H.R. (1998). Identification of xanthurenic acid as the putative inducer  
935 of malaria development in the mosquito. *Nature* **392**, 289-292.
- 936 15. Leopold, S.J., Apinan, S., Ghose, A., Kingston, H.W., Plewes, K.A., Hossain, A., Dutta,  
937 A.K., Paul, S., Barua, A., Sattar, A., et al. (2019). Amino acid derangements in adults  
938 with severe *falciparum* malaria. *Sci Rep* **9**, 6602.
- 939 16. Badcock, N.R., Spence, J.G., and Stern, L.M. (1987). Blood serotonin levels in adults,  
940 autistic and non-autistic children--with a comparison of different methodologies. *Ann*  
941 *Clin Biochem* **24** ( Pt 6), 625-634.
- 942 17. Josling, G.A., and Llinas, M. (2015). Sexual development in *Plasmodium* parasites:  
943 knowing when it's time to commit. *Nature reviews. Microbiology* **13**, 573-587.
- 944 18. Wang, M., An, Y., Gao, L., Dong, S., Zhou, X., Feng, Y., Wang, P., Dimopoulos, G.,  
945 Tang, H., and Wang, J. (2021). Glucose-mediated proliferation of a gut commensal  
946 bacterium promotes *Plasmodium* infection by increasing mosquito midgut pH. *Cell*  
947 *reports* **35**, 108992.
- 948 19. Banskota, S., Ghia, J.E., and Khan, W.I. (2019). Serotonin in the gut: Blessing or a  
949 curse. *Biochimie* **161**, 56-64.
- 950 20. Spohn, S.N., and Mawe, G.M. (2017). Non-conventional features of peripheral  
951 serotonin signalling - the gut and beyond. *Nat Rev Gastroenterol Hepatol* **14**, 412-420.
- 952 21. Egwu, C.O., Augereau, J.M., Reybier, K., and Benoit-Vical, F. (2021). Reactive Oxygen  
953 Species as the Brainbox in Malaria Treatment. *Antioxidants* **10**. ARTN 1872
- 954 22. Ewald, C.Y. (2018). Redox Signaling of NADPH Oxidases Regulates Oxidative Stress  
955 Responses, Immunity and Aging. *Antioxidants (Basel)* **7**.
- 956 23. Aviello, G., and Knaus, U.G. (2018). NADPH oxidases and ROS signaling in the  
957 gastrointestinal tract. *Mucosal Immunol* **11**, 1011-1023.
- 958 24. Regmi, S.C., Park, S.Y., Ku, S.K., and Kim, J.A. (2014). Serotonin regulates innate  
959 immune responses of colon epithelial cells through Nox2-derived reactive oxygen  
960 species. *Free radical biology & medicine* **69**, 377-389.
- 961 25. Koram, K.A., Adu, B., Ocran, J., Karikari, Y.S., Adu-Amankwah, S., Ntiri, M., Abuaku,  
962 B., Doodoo, D., Gyan, B., Kronmann, K.C., and Nkrumah, F. (2016). Safety and  
963 Immunogenicity of EBA-175 RII-NG Malaria Vaccine Administered Intramuscularly in  
964 Semi-Immune Adults: A Phase 1, Double-Blinded Placebo Controlled Dosage  
965 Escalation Study. *PloS one* **11**, e0163066.
- 966 26. Manzella, N., Santin, Y., Maggiorani, D., Martini, H., Douin-Echinard, V., Passos, J.F.,  
967 Lezoualc'h, F., Binda, C., Parini, A., and Mialet-Perez, J. (2018). Monoamine oxidase-  
968 A is a novel driver of stress-induced premature senescence through inhibition of parkin-  
969 mediated mitophagy. *Aging Cell* **17**, e12811.
- 970 27. Palikaras, K., Lionaki, E., and Tavernarakis, N. (2018). Mechanisms of mitophagy in  
971 cellular homeostasis, physiology and pathology. *Nat Cell Biol* **20**, 1013-1022.
- 972 28. Schaaf, M.B., Keulers, T.G., Vooijs, M.A., and Rouschop, K.M. (2016). LC3/GABARAP  
973 family proteins: autophagy-(un)related functions. *FASEB journal : official publication of*



- 974 the Federation of American Societies for Experimental Biology 30, 3961-3978.
- 975 29. Eisenberg, T., Abdellatif, M., Schroeder, S., Primessnig, U., Stekovic, S., Pendl, T.,  
976 Harger, A., Schipke, J., Zimmermann, A., Schmidt, A., et al. (2016). Cardioprotection  
977 and lifespan extension by the natural polyamine spermidine. *Nature medicine* 22, 1428-  
978 1438.
- 979 30. Schroeder, S., Hofer, S.J., Zimmermann, A., Pechlaner, R., Dammbroek, C., Pendl,  
980 T., Marcello, G.M., Pogatschnigg, V., Bergmann, M., Muller, M., et al. (2021). Dietary  
981 spermidine improves cognitive function. *Cell reports* 35. ARTN 108985
- 982 31. Fung, T.C., Vuong, H.E., Luna, C.D.G., Pronovost, G.N., Aleksandrova, A.A., Riley,  
983 N.G., Vavilina, A., McGinn, J., Rendon, T., Forrest, L.R., and Hsiao, E.Y. (2019).  
984 Intestinal serotonin and fluoxetine exposure modulate bacterial colonization in the gut.  
985 *Nature microbiology* 4, 2064-2073.
- 986 32. Takenaka, Y., Tanaka, R., Kitabatake, K., Kuramochi, K., Aoki, S., and Tsukimoto, M.  
987 (2022). Profiling Differential Effects of 5 Selective Serotonin Reuptake Inhibitors on  
988 TLRs-Dependent and -Independent IL-6 Production in Immune Cells Identifies  
989 Fluoxetine as Preferred Anti-Inflammatory Drug Candidate. *Frontiers in pharmacology*  
990 13, 874375.
- 991 33. Yabut, J.M., Crane, J.D., Green, A.E., Keating, D.J., Khan, W.I., and Steinberg, G.R.  
992 (2019). Emerging Roles for Serotonin in Regulating Metabolism: New Implications for  
993 an Ancient Molecule. *Endocr Rev* 40, 1092-1107.
- 994 34. Chen, W.J. (2011). IDO: more than an enzyme. *Nature immunology* 12, 809-U.
- 995 35. Tetsutani, K., To, H., Torii, M., Hisaeda, H., and Himeno, K. (2007). Malaria parasite  
996 induces tryptophan-related immune suppression in mice. *Parasitology* 134, 923-930.
- 997 36. Dos Santos, R.O., Goncalves-Lopes, R.M., Lima, N.F., Scopel, K.K.G., Ferreira, M.U.,  
998 and Lalwani, P. (2020). Kynurenine elevation correlates with T regulatory cells increase  
999 in acute *Plasmodium vivax* infection: A pilot study. *Parasite immunology* 42, e12689.
- 1000 37. Sanni, L.A., Thomas, S.R., Tattam, B.N., Moore, D.E., Chaudhri, G., Stocker, R., and  
1001 Hunt, N.H. (1998). Dramatic changes in oxidative tryptophan metabolism along the  
1002 kynurenine pathway in experimental cerebral and noncerebral malaria. *Am J Pathol*  
1003 152, 611-619.
- 1004 38. Beraldo, F.H., and Garcia, C.R. (2005). Products of tryptophan catabolism induce Ca<sup>2+</sup>  
1005 release and modulate the cell cycle of *Plasmodium falciparum* malaria parasites. *J*  
1006 *Pineal Res* 39, 224-230.
- 1007 39. Locher, C.P., Ruben, P.C., Gut, J., and Rosenthal, P.J. (2003). 5HT1A serotonin  
1008 receptor agonists inhibit *Plasmodium falciparum* by blocking a membrane channel.  
1009 *Antimicrobial agents and chemotherapy* 47, 3806-3809.
- 1010 40. Wu, H., Denna, T.H., Storkersen, J.N., and Gerriets, V.A. (2019). Beyond a  
1011 neurotransmitter: The role of serotonin in inflammation and immunity. *Pharmacol Res*  
1012 140, 100-114.
- 1013 41. Andres, M., Seifert, M., Spalthoff, C., Warren, B., Weiss, L., Giraldo, D., Winkler, M.,  
1014 Pauls, S., and Gopfert, M.C. (2016). Auditory Efferent System Modulates Mosquito  
1015 Hearing. *Current biology : CB* 26, 2028-2036.
- 1016 42. Hillyer, J.F., Estevez-Lao, T.Y., and Mirzai, H.E. (2015). The neurotransmitters  
1017 serotonin and glutamate accelerate the heart rate of the mosquito *Anopheles gambiae*.

- 1018 Comp Biochem Physiol A Mol Integr Physiol 188, 49-57.
- 1019 43. Briggs, A.M., Hambly, M.G., Simao-Gurge, R.M., Garrison, S.M., Khaku, Z., Van  
1020 Susteren, G., Lewis, E.E., Riffell, J.A., and Luckhart, S. (2022). *Anopheles stephensi*  
1021 Feeding, Flight Behavior, and Infection With Malaria Parasites are Altered by Ingestion  
1022 of Serotonin. *Frontiers in physiology* 13, 911097.
- 1023 44. Ngai, M., Shoue, D.A., Loh, Z., and McDowell, M.A. (2019). The pharmacological and  
1024 functional characterization of the serotonergic system in *Anopheles gambiae* and  
1025 *Aedes aegypti*: influences on flight and blood-feeding behavior. *Scientific reports* 9,  
1026 4421.
- 1027 45. Karahoda, R., Horackova, H., Kastner, P., Matthios, A., Cerveny, L., Kucera, R.,  
1028 Kacerovsky, M., Duintjer Tebbens, J., Bonnin, A., Abad, C., and Staud, F. (2020).  
1029 Serotonin homeostasis in the materno-foetal interface at term: Role of transporters  
1030 (SERT/SLC6A4 and OCT3/SLC22A3) and monoamine oxidase A (MAO-A) in uptake  
1031 and degradation of serotonin by human and rat term placenta. *Acta Physiol (Oxf)* 229,  
1032 e13478.
- 1033 46. Nocito, A., Dahm, F., Jochum, W., Jang, J.H., Georgiev, P., Bader, M., Renner, E.L.,  
1034 and Clavien, P.A. (2007). Serotonin mediates oxidative stress and mitochondrial  
1035 toxicity in a murine model of nonalcoholic steatohepatitis. *Gastroenterology* 133, 608-  
1036 618.
- 1037 47. Soll, C., Jang, J.H., Riener, M.O., Moritz, W., Wild, P.J., Graf, R., and Clavien, P.A.  
1038 (2010). Serotonin promotes tumor growth in human hepatocellular cancer. *Hepatology*  
1039 51, 1244-1254.
- 1040 48. Zandalinas, S.I., and Mittler, R. (2018). ROS-induced ROS release in plant and animal  
1041 cells. *Free radical biology & medicine* 122, 21-27.
- 1042 49. Carvajal-Lago, L., Ruiz-Lopez, M.J., Figuerola, J., and Martinez-de la Puente, J. (2021).  
1043 Implications of diet on mosquito life history traits and pathogen transmission. *Environ*  
1044 *Res* 195, 110893.
- 1045 50. Wagar, Z.L., Tree, M.O., Mpoy, M.C., and Conway, M.J. (2017). Low density  
1046 lipopolyprotein inhibits flavivirus acquisition in *Aedes aegypti*. *Insect molecular biology*  
1047 26, 734-742.
- 1048 51. Zhu, Y., Zhang, C., Zhang, L., Yang, Y., Yu, X., Wang, J., Liu, Q., Wang, P., and Cheng,  
1049 G. (2021). A human-blood-derived microRNA facilitates flavivirus infection in fed  
1050 mosquitoes. *Cell reports* 37, 110091.
- 1051 52. Zhu, Y., Tong, L., Nie, K., Wiwatanaratnabutr, I., Sun, P., Li, Q., Yu, X., Wu, P., Wu, T.,  
1052 Yu, C., et al. (2019). Host serum iron modulates dengue virus acquisition by  
1053 mosquitoes. *Nature microbiology* 4, 2405-2415.
- 1054 53. Klaessens, S., Stroobant, V., Hoffmann, D., Gyrd-Hansen, M., Pilotte, L., Vigneron, N.,  
1055 De Plaen, E., and Van den Eynde, B.J. (2021). Tryptophanemia is controlled by a  
1056 tryptophan-sensing mechanism ubiquitinating tryptophan 2,3-dioxygenase. *Proceedings of the National Academy of Sciences of the United States of America* 118.  
1057 ARTN e2022447118.  
1058
- 1059 54. Santana, R.A.G., Oliveira, M.C., Cabral, I., Junior, R., de Sousa, D.R.T., Ferreira, L.,  
1060 Lacerda, M.V.G., Monteiro, W.M., Abrantes, P., Guerra, M., and Silveira, H. (2019).  
1061 *Anopheles aquasalis* transcriptome reveals autophagic responses to *Plasmodium*

- 1062 *vivax* midgut invasion. *Parasites & vectors* *12*, 261.
- 1063 55. Liu, J., Liu, Y., Nie, K., Du, S., Qiu, J., Pang, X., Wang, P., and Cheng, G. (2016).  
1064 Flavivirus NS1 protein in infected host sera enhances viral acquisition by mosquitoes.  
1065 *Nature microbiology* *1*, 16087.
- 1066 56. Aplak, E., von Montfort, C., Haasler, L., Stucki, D., Steckel, B., Reichert, A.S., Stahl,  
1067 W., and Brenneisen, P. (2020). CNP mediated selective toxicity on melanoma cells is  
1068 accompanied by mitochondrial dysfunction. *PloS one* *15*. ARTN e0227926.
- 1069 57. Lazarou, M., Sliter, D.A., Kane, L.A., Sarraf, S.A., Wang, C., Burman, J.L., Sideris, D.P.,  
1070 Fogel, A.I., and Youle, R.J. (2015). The ubiquitin kinase PINK1 recruits autophagy  
1071 receptors to induce mitophagy. *Nature* *524*, 309-314.
- 1072 58. Song, X., Wang, M., Dong, L., Zhu, H., and Wang, J. (2018). PGRP-LD mediates *A.*  
1073 *stephensi* vector competency by regulating homeostasis of microbiota-induced  
1074 peritrophic matrix synthesis. *PLoS Pathog* *14*, e1006899.
- 1075 59. Song, J., Hou, X., Hu, X., Lu, C., Liu, C., Wang, J., Liu, W., Teng, L., and Wang, D.  
1076 (2015). Not only serotonergic system, but also dopaminergic system involved in  
1077 albiflorin against chronic unpredictable mild stress-induced depression-like behavior in  
1078 rats. *Chem Biol Interact* *242*, 211-217.
- 1079 60. Yamada, J., Sugimoto, Y., Wakita, H., and Horisaka, K. (1988). The involvement of  
1080 serotonergic and dopaminergic systems in hypothermia induced in mice by  
1081 intracerebroventricular injection of serotonin. *Jpn J Pharmacol* *48*, 145-148.
- 1082 61. Banerjee, T., Jaijyan, D.K., Surolia, N., Singh, A.P., and Surolia, A. (2012). Apicoplast  
1083 triose phosphate transporter (TPT) gene knockout is lethal for *Plasmodium*. *Molecular*  
1084 *and biochemical parasitology* *186*, 44-50.
- 1085 62. Rodríguez-Colman, M.J., Schewe, M., Meerlo, M., Stigter, E., Gerrits, J., Pras-Raves,  
1086 M., Sacchetti, A., Hornsveld, M., Oost, K.C., Snippert, H.J., et al. (2017). Interplay  
1087 between metabolic identities in the intestinal crypt supports stem cell function. *Nature*  
1088 *543*, 424-427.
- 1089 63. Hong, X., Isern, J., Campanario, S., Perdiguero, E., Ramirez-Pardo, I., Segales, J.,  
1090 Hernansanz-Agustin, P., Curtabbi, A., Deryagin, O., Pollan, A., et al. (2022).  
1091 Mitochondrial dynamics maintain muscle stem cell regenerative competence  
1092 throughout adult life by regulating metabolism and mitophagy. *Cell Stem Cell* *29*, 1506-  
1093 1508.
- 1094 64. Han, S., Zhang, M., Jeong, Y.Y., Margolis, D.J., and Cai, Q. (2021). The role of  
1095 mitophagy in the regulation of mitochondrial energetic status in neurons. *Autophagy* *17*,  
1096 4182-4201.
- 1097 65. Bingol, B., Tea, J.S., Phu, L., Reichelt, M., Bakalarski, C.E., Song, Q., Foreman, O.,  
1098 Kirkpatrick, D.S., and Sheng, M. (2014). The mitochondrial deubiquitinase USP30  
1099 opposes parkin-mediated mitophagy. *Nature* *510*, 370-375.
- 1100 66. Skorpilova, T., Sistkova, I., Adamcova, M., Pohunek, V., Kruzik, V., and Sevcik, R.  
1101 (2019). Measuring citrate synthase activity as an enzymatic approach to the  
1102 differentiation of chilled and frozen/thawed meat. *Meat Sci* *158*. ARTN 107856.
